1  
2  
3  
4  
5  
6  
7  
8  
9  
10  
11  
12  
13  
14  
15  
16  
17  
18  
19  
20  
21  
22  
23  
24  
25  
26

**The evolution of active vibrissal sensing in mammals: evidence from  
vibrissal musculature and function in the marsupial opossum *Monodelphis  
domestica***

Robyn A. Grant<sup>1</sup>, Sebastian Haidarliu<sup>2</sup>, Natalie J. Kennerley<sup>3</sup>, Tony J. Prescott<sup>3\*</sup>

1. Division of Biology & Conservation Ecology, Manchester Metropolitan University,  
Manchester, UK.

2. Department of Neurobiology, The Weizmann Institute, Rehovot, Israel.

3. Department of Psychology, University of Sheffield, Western Bank, Sheffield, UK.

\*corresponding author: t.j.prescott@sheffield.ac.uk

Short title: Evolution of active vibrissal sensing

Key words: opossum, rat, whiskers, vibrissae, whisking, active sensing, mammalian  
evolution.

The Journal of Experimental Biology – ACCEPTED AUTHOR MANUSCRIPT

27

28 List of abbreviations:

|    |     |                                                  |
|----|-----|--------------------------------------------------|
| 29 | A   | Attachment place                                 |
| 30 | CCO | Cytochrome Oxidase                               |
| 31 | DAB | Diaminobenzidine                                 |
| 32 | FB  | Fibrous bundles                                  |
| 33 | FBP | Furry Buccal Pad                                 |
| 34 | FE  | Fibrous extensions                               |
| 35 | HF  | Horizontal fascicles (of intrinsic muscles)      |
| 36 | M.  | musculus                                         |
| 37 | ML  | M. maxillolabialis                               |
| 38 | MP  | Pars maxillaris profunda                         |
| 39 | MS  | Pars maxillaris superficialis                    |
| 40 | N   | Nostril                                          |
| 41 | NL  | M. nasolabialis                                  |
| 42 | NS  | Nostril                                          |
| 43 | NV  | Nasal Vibrissae                                  |
| 44 | OF  | Oblique fascicles (of oblique intrinsic muscles) |
| 45 | PB  | Phosphate Buffer                                 |
| 46 | PIP | Pars interna profunda                            |
| 47 | PM  | premaxilla                                       |
| 48 | PMI | Pars media inferior                              |
| 49 | PMS | Pars media superior                              |
| 50 | R   | Rostral                                          |
| 51 | RCS | Royal College of Surgeons                        |
| 52 | V   | Ventral                                          |

53

54

55 **Summary**

56 Facial vibrissae, or whiskers, are found in nearly all extant mammal species and are likely to  
57 have been present in early mammalian ancestors. A sub-set of modern mammals, including  
58 many rodents, move their long mystacial whiskers back-and-forth at high speed whilst  
59 exploring in a behaviour known as “whisking”. It is not known whether the vibrissae of early  
60 mammals moved in this way. The gray short-tailed opossum, *Monodelphis domestica*, is  
61 considered a useful species from the perspective of tracing the evolution of modern  
62 mammals. Interestingly, these marsupials engage in whisking bouts similar to those seen in  
63 rodents. To better assess the likelihood that active vibrissal sensing was present in ancestral  
64 mammals we examined the vibrissal musculature of the opossum using digital microscopy to  
65 see if this resembles that of rodents. Although opossums have fewer whiskers than rats, our  
66 investigation found that the vibrissal musculature is similar in both species. In particular, in  
67 both rats and opossums, the musculature includes both intrinsic and extrinsic muscles with  
68 the intrinsic muscles positioned as slings linking pairs of large vibrissae within rows. We  
69 identified some differences in the extrinsic musculature which, interestingly, matched with  
70 behavioural data obtained through high-speed video recording, and indicated additional  
71 degrees of freedom for positioning the vibrissae in rats. These data show that the whisker  
72 movements of opossum and rat exploit similar underlying mechanisms. Paired with earlier  
73 results suggesting similar patterns of vibrissal movement, this strongly implies that early  
74 therian (marsupial and placental) mammals were whisking animals that actively controlled  
75 their vibrissae.

76 **Introduction**

77 The early evolution of mammals is associated with a number of significant milestones such as  
78 the onset of thermoregulation, restructuring of the inner ear, and the emergence of a six-  
79 layered cortex. Hair also appears in mammals for the first time, probably having a role in  
80 tactile sensing prior to the appearance of pelage hair as a means of maintaining body  
81 temperature (Maderson, 1972, 2003). Indeed, some of the first hairs may well have been  
82 facial vibrissae, or whiskers, similar to those found in nearly all extant mammal species  
83 (Pocock, 1914; Ahl, 1986). Many terrestrial mammals that have well-developed mystacial  
84 whiskers, termed macrovibrissae, move them back-and-forth at high-speed during  
85 exploration, a behaviour known as “whisking” (Wineski, 1985; Mitchinson et al., 2011).  
86 Whisking is a form of active tactile sensing (Prescott et al., 2011) and, in rodents such as rats  
87 and mice, is regulated by sensory feedback in a manner that appears to boost the sensory  
88 information obtained by the animal (Mitchinson et al., 2007). We recently showed  
89 (Mitchinson et al., 2011) that similar patterns of rhythmic macrovibrissal movement, also  
90 under sensory guidance, are present in *Monodelphis domestica* (Wagner, 1842), a small  
91 ground-dwelling marsupial native to South America, whose last common ancestor with  
92 modern rodents was an early mammal of the Triassic period living more than 160 million  
93 years ago (Luo et al., 2011). The presence of whisking in both rodents and marsupials  
94 therefore presents the intriguing possibility that a common ancestor to all modern therians  
95 (marsupial and placental mammals) may have employed active vibrissal sensing. However,  
96 by observing behaviour alone it is not possible to rule out the possibility of convergent  
97 evolution of whisking in rodents and the opossum. That is, both lines may have evolved the  
98 capacity to actuate their whiskers at a later time, due to similar evolutionary pressures. Fossil  
99 evidence is not able to resolve this issue as the few fossilized skulls of early mammals that  
100 have so far been found have not preserved evidence of facial musculature (Ji et al., 2002;  
101 Luo, 2007; Luo et al., 2011). The alternative strategy, pursued here, is to explore this  
102 question via comparative physiology. Specifically, the hypothesis of convergent evolution of  
103 active vibrissal sensing in both rodents and marsupials would appear much less likely if we  
104 can obtain evidence that the underlying mechanisms are similar in these two groups of  
105 whisking animals. To that end, in the current study we studied the anatomy of the opossum  
106 mystacial pad making direct comparisons between the vibrissal musculature of this animal  
107 and that of the common rat.

108 Whereas the vibrissal musculature of the rat has recently been described in detail (Haidarliu,  
109 2010; Hairadliu, 2012), that of the opossum had not hitherto been mapped, we therefore  
110 replicated the methodology of our earlier study of the rat facial musculature using  
111 cytochrome oxidase (CCO) staining (Haidarliu, 2010) to obtain digital microscope images of  
112 the opossum mystacial pad that could be directly compared with those of rodents. This  
113 method identifies interesting similarities and differences in the vibrissal muscles of the two  
114 species. Most importantly, we investigate here whether the large facial whiskers are moved  
115 by an intrinsic sling-like musculature that connects each whisker follicle to the adjacent one  
116 along each whisker row. There are many ways in which muscles might be configured in order  
117 to provide whisker protraction, if this specific mechanism is present in both rodents and  
118 marsupials it strongly indicates that whisking in rats and opossum is not convergent but  
119 represents a shared inherited trait.

120

121 As well as controlling back and forth whisking movements, recently described extrinsic  
122 muscles also control more complex whisker behaviours that can occur in both the protraction  
123 and retraction phases of the whisk (Haidarliu et al. 2010). We have previously shown  
124 (Mitchinson et al., 2011) that the periodic whisker movements of rats, mice, and opossums,  
125 become bilaterally asymmetric (i.e. left and right whisker fields protract by different  
126 amounts) under conditions where the animal is making a head-turn (head-turning asymmetry)  
127 or making contact with an object at an oblique angle (contact-induced asymmetry). This  
128 modulation is consistent with active sensing strategies that promote exploration in the  
129 direction of movement, in the case of head-turning asymmetry, or increase the likelihood of  
130 further whisker-object contacts in the case of contact-induced asymmetry. In an earlier study  
131 (Grant et al., 2009) we also showed that when rats are exploring a vertical surface they also  
132 reduce the angular separation, or *spread*, of their whiskers by differentially controlling the  
133 velocity of movement of the more rostral and more dorsal whiskers (and possibly also by  
134 reshaping the mystacial pad, see Haidarliu et al. 2010). Spread reduction also results in an  
135 increased number of contacts with a surface that is being investigated and thus can be  
136 understood as a further element of active sensing control. In this investigation, we explore  
137 whether the corresponding extrinsic musculature is present in the opossum and similar to the  
138 rat. In addition, we obtain new videographic data for the opossum to determine whether it is  
139 able to differentially control the velocities of rostral and caudal vibrissae so as to modify  
140 angular spread and retraction velocities.

141

142 Comparative analysis of the vibrissal musculature in these two distantly related mammalian  
143 groups therefore casts new light both on the sensory capabilities of early mammals and, at the  
144 same time, helps us to understand how modification of the facial musculature in vibrissal  
145 specialists such as the rat has perhaps enabled modern rodents to better exploit this uniquely  
146 mammalian sense.

147

## 148 **Materials and Methods**

### 149 **Muscle Staining**

#### 150 *Animals*

151 Four 1-year-old opossums (*Monodelphis domestica*) were used in this study, 1 female and 3  
152 males. The animals were obtained from a colony maintained by the University of Trieste, and  
153 all procedures required for keeping and sacrificing the animals were approved by the local  
154 Ethics Committee and communicated to the Ministerial Office, Trieste. For the purpose of the  
155 current study the animals were anaesthetised with urethane (Urethane, 25%, 0.65 mL/100g  
156 body weight) and perfused transcardially (100ml of phosphate buffer (PB) pH=7.4 followed  
157 by a mixture of 2.5% glutaraldehyde, 0.5% paraformaldehyde and 5% sucrose in 0.1 M PB).  
158 They were then decapitated, placed in the perfusion solution to which an additional 25%  
159 sucrose was added and refrigerated overnight. The mystacial pads were then removed  
160 bilaterally, by cutting down the sagittal plane and cutting around each pad (about 2 mm each  
161 side of the pad). Any pieces of bone were removed from the pads and they were placed flat  
162 between stainless steel grids in perforated plastic histology cases (Medex Supply) to prevent  
163 curling. The histology cases were then put into a solution of 20% sucrose in 0.1M Phosphate  
164 buffer pH 7.4 for 2 days and refrigerated. In addition to facial vibrissae the opossum also has  
165 prominent genal (cheek) vibrissae. In one male and one female we therefore also removed  
166 the genal whisker area and stored them in the same way.

167

#### 168 *Staining of the mystacial pads*

169 After fixing, each of the pads was sectioned with a *Microm cryostar* cryostat into 50  $\mu$ m  
170 slices. As there were eight pads (from four animals), six pads were sliced tangentially and  
171 two pads were sliced coronally. The four genal areas were all sliced tangentially. All slices  
172 were stained for CCO activity (based on Haidarliu et al. 2010) as follows. The slices were

173 floated in a solution of 10 ml of 0.1 M PB containing 0.75 mg Cytochrome C, 40 µl catalase  
174 solution and 5 mg Diaminobenzidine (DAB) and 0.5 ml distilled water. They were then  
175 placed in an incubator at 37°C on a shaking platform for 1-2 hours until the stain developed  
176 (i.e. until there was a strong difference between reactive and unreactive tissues). The slices  
177 were then rinsed in 0.05 M PB, mounted in distilled water and left to air dry briefly before  
178 coverslipping with Entellan.

179 Figures of the stained musculature were prepared from digital images. A Nikon light  
180 microscope with objectives 1x, 2x, 20x, 40x was used to obtain the images which were  
181 collected in SPOT and exported as .tif images. Some panels in Figure 4 were collected on  
182 Leica fluorescent microscope with a blue filter. Only small adjustments in contrast and  
183 brightness were made to the figures. The intrinsic muscle figure (in Figure 2a) was made by  
184 combining two consecutive slices.

185

### 186 **Xylene clearing of skin**

187 One male 2-year-old opossum was used to get a clear picture of the pad layout, by clearing  
188 with xylene as follows. The mystacial pads and genal areas were removed from each side, as  
189 above. The samples were then shaved, the fatty layers removed from the bottom with a  
190 scalpel, pressed flat and dehydrated with ethyl alcohol (50%, 70%, 95% and 100%), then  
191 immersed in xylene until they became transparent. The prepared samples were then lit from  
192 below with a spotlight and photographed using a Canon digital camera.

193

### 194 **Behaviour Filming**

#### 195 *Animals*

196 Behavioural clips were collected for a previous study (Mitchinson et al. 2011), but re-  
197 analysed for the current study. 26 opossums (*Monodelphis domestica*), each around one year  
198 old, were filmed using high-speed videography at the University of Trieste animal facility.  
199 The experimental setup was as described in Mitchinson et al. (2011). Specifically, a high-  
200 speed, high-resolution (1024x1024) digital video camera (*Photron Fastcam*) was suspended  
201 above a transparent viewing arena illuminated from below with a custom-built light box.  
202 Animals were placed into the arena, one at a time, and allowed to freely explore. In half the  
203 trials, a perspex block was placed in the arena beneath the camera field-of-view. Video data  
204 was collected in near darkness using an infrared light box for illumination. Multiple 1.6  
205 second video clips, at 500 frames per second, were collected opportunistically (by manual  
206 trigger) when the animal moved beneath the field of view of the camera. Comparison data

207 from nineteen rats (12 Royal College of Surgeons (RCS) dystrophic rats, 7 Hooded Listers)  
208 was collected under similar circumstances, at University of Sheffield animal facilities, with a  
209 light-box operating in the visible light spectrum. Previous investigations have found that the  
210 whisker movements of genetically-blind (dystrophic) and sighted animals are similar in these  
211 conditions with both strains displaying modulation of whisker movement indicating the use  
212 of active touch sensing strategies (Mitchinson et al., 2007, 2011; Grant et al., 2009).

213

#### 214 *Clip selection and whisker tracking*

215 Clip selection was based on the criteria given in Mitchinson et al. (2011). Specific clips were  
216 chosen to include i) episodes of *regular whisking*, when the animal was moving its whiskers  
217 periodically without contacting anything but the smooth floor; and/or ii) episodes of *contact*  
218 *whisking*, where the animal was contacting one corner of a perspex block with its whiskers,  
219 with no nearby obstructions, other than the floor. The animal's snout and whiskers were  
220 tracked in each clip episode, using the BIOTACT Whisker Tracking Tool (Mitchinson et al.,  
221 2011, Perkon et al., 2011). The output of the tracker, for each video frame, is the orientation  
222 and position of the snout, and a set of "whisker curves", from which whisker angular position  
223 (relative to the midline of the head), for each identified whisker, can be derived. For the  
224 opossum, tracking parameters were set such that only the mystacial vibrissae were tracked  
225 and not the genal vibrissae (but see below for measurements of genal whisker motion).  
226 Tracking was validated by manually inspecting the tracking overlaid on to the video frames.

227 Our analyses focus on the movement of the entire whisker field on each side of the snout  
228 using a measure of *mean angular position* calculated as the unsmoothed mean of all the  
229 tracked whisker angular positions on each side and in each frame. We also computed a  
230 measure of horizontal dispersion of the whiskers in each field termed the mean *angular*  
231 *spread* and calculated as the standard deviation of all the tracked whisker angular positions in  
232 each frame. Finally, we computed mean angular *retraction* and *protraction velocities*,  
233 calculated from the angular position, as the average velocity of all the backward (negative)  
234 whisker movements, and forward (positive) whisker movements, respectively. These  
235 measures were all averaged to give a mean value per clip. Note that there was no tracking of  
236 whiskers across frames, therefore the number of identified whiskers varied across frames and  
237 clips. Our previous investigation (Mitchinson et al., 2011) demonstrated that these automated  
238 estimates of whisker motion provide a good proxy for estimates calculated by tracking by  
239 eye. In the current study, both the mean angular position and angular spread measures were  
240 further validated by examining video tracking and plots of each clip. To reduce noise, we also



241 included clips only if there were four or more whiskers tracked on each side of the face, for  
242 the entire episode of interest. This led to the inclusion of 30 and 51 regular whisking clips,  
243 and 23 and 43 contact whisking clips, respectively, for rat and opossum. Examples of raw  
244 data can be found in Figure 7. Identical tracking and analysis routines were used with both  
245 opossum and rat clips which should ensure similar levels of noise in the tracking data.

246

247 To examine the capacity for movement in the genal whiskers we also tracked, by visual  
248 inspection using a manual whisker tracking tool as described in Mitchinson et al. (2007), one  
249 genal whisker and two macrovibrissae (one in each of the left and right whiskers fields) in  
250 twelve clips of regular whisking, between 0.55 and 1.3 seconds in length.

251

## 252 **Results**

253

### 254 **Whisker layout and general appearance**

255 Opossum whiskers are arranged in a grid-like pattern of rows and arcs (Figure 1a and c),  
256 visually somewhat similar to that seen in rats (compare Figure 1b and d), but with twenty-  
257 three whiskers in total on each side compared to thirty (typically) in the rodent species. In the  
258 opossum, the whiskers form four rows, labelled A-D (Figure 1c), with three to seven large  
259 whiskers in each, whereas the rat has five rows of up to seven whiskers each. The dorsal-most  
260 row A of the opossum contains just three whiskers (A0, A1 and A2), row B, four whiskers  
261 (B1 –B4), and each of the two ventral rows (C and D) has seven whiskers (C0 – C6, and D0 –  
262 D6). The overall grid-like pattern is disturbed by the two “straddler” whiskers,  $\alpha$  and  $\beta$ , at the  
263 caudal edge of the pad, whose horizontal alignment is offset relative to the main whisker  
264 rows such that  $\alpha$  is positioned between the rows A to B, and  $\beta$  between B to C (Figure 1c).  
265 Vertically, these whiskers are reasonably well aligned with the most caudal whiskers in rows  
266 A, C, and D, such that they form part of the first whisker arc (A0,  $\alpha$ ,  $\beta$ , C0, D0) (Figure 1g).  
267 For comparison, the rat whisker array has four straddlers offset vertically relative to the five  
268 whisker rows (Figure 1d) and appearing to form their own arc. Overall, the mystacial pad is  
269 generally less prominent in the opossum compared to the rat (compare Figures 1a and b), the  
270 opossum also lacks the prominent microvibrissal array—the short non-actuated whiskers on  
271 the chin and upper lip—that is seen in rodents such as rats and mice. The opossum does,  
272 however, have a few nasal whiskers arranged in a horizontal row (Figure 1c, labelled NV),

273 which have rudimentary sling-like muscles (Figure 1e, on the most dorsal most follicles,  
274 compare positions to NV in Figure 1c). In addition there is a furry buccal pad (FBP, the area  
275 of the pad containing follicles ventral and caudal to the whisker pad), with hair follicles that  
276 are not arranged into rows (Figure 1c). The whiskers of the furry buccal pad differ from the  
277 whiskers of the mystacial pad in that they are smaller and have no intrinsic muscles. Part of  
278 the buccal pad is positioned more caudally than the mystacial whiskers, and the ventral  
279 fascicles of the musculus (*m.*) *nasolabialis* and *m. maxillolabialis* separate the furry buccal  
280 pad from row D (Figure 1e, note the FBP is below the dark muscle staining in the ventral area  
281 of the pad). Opossum whisker follicles have a well-defined capsule, and can contain both  
282 cavernous and ring sinuses, sometimes the ringwulst (a doughnut shaped structure) can be  
283 observed in large whiskers (see, e.g. Figure 2b), thus structurally they have many similarities  
284 to the vibrissal follicles of the rat.

285  
286

### 287 **Intrinsic Muscles**

288 In tangential slices cut through the entire opossum snout and stained for CCO activity,  
289 intrinsic muscles are easily defined as short, dark-brown strips connecting the large  
290 neighbouring whiskers in each row (Figure 1e and 2a, b and c). A key finding is that within  
291 each of the rows, the whiskers are connected to each other by sling-like intrinsic muscles as  
292 previously described for a variety of whisking rodents (see Discussion). Although there is  
293 substantial similarity in this overall arrangement there are some interesting differences  
294 between the opossum and rat musculature that we detail next.

295

296 In the rat, intrinsic muscles connect the straddler whisker  $\beta$  to both rows B and C, and  $\gamma$  with  
297 both rows C and D (Haidarliu and Ahissar 1997, and Figure 1f). However, in the opossum,  
298 the situation is inverted, as whisker B1 connects to, or “straddles” the two large caudal  
299 whiskers ( $\alpha$  and  $\beta$ ), such that the dorsal-most part of the B1 intrinsic muscle attaches to the  
300 ventral part of  $\alpha$ , and the ventral-most part of the B1 intrinsic muscle attaches to the dorsal  
301 part of  $\beta$  (Figure 2b and c). Due to these differences, henceforth we will refer to the  $\alpha$  and  $\beta$   
302 whiskers as *inverted-straddlers*.

303

304 In rows A and B, in the opossum, in addition to intrinsic muscles composed of a sling and  
305 two caudally-directed horizontal muscle fascicles (HF in Figure 2c), each pair of whiskers is

306 also joined by a supplementary intrinsic muscle fascicle that connects the ventral capsular  
307 surface of the more rostral whisker follicle with dorsal capsular surface of a more caudal  
308 whisker follicle in the same row (OF in Figure 2c). From the capsule of the caudal-most  
309 whisker in opossum row A (A0), a third muscle strip also originates. It is directed  
310 dorsocaudal and inserted into the *corium*, the base layer of the mystacial pad. The location of  
311 the origin and insertion sites of these oblique muscle strips suggests that they might serve for  
312 torsional rotation of the whiskers in rows A and B during protraction, and simultaneously for  
313 ventral whisker shaft deflection that may result in whisker palpation of the objects from  
314 above. Interestingly, the presence of such oblique muscle strips, termed here *oblique intrinsic*  
315 *muscles*, has not been reported in any other whisking species.

316

317 That the dorsal two whisker rows in the opossum are notably different to the ventral two rows  
318 in their intrinsic musculature suggests that there might be a compartmentalisation of the  
319 whisker pad. If so, the layout in the opossum could be considered as having a *nasal*  
320 *compartment* containing two rows of whiskers (A and B) and the two inverted-straddlers, and  
321 a *maxillary compartment* containing two rows of seven whiskers without straddlers (Figure  
322 1c). In the nasal compartment, the two inverted-straddlers fortify the dorso-caudal section of  
323 the mystacial pad, which is well-aligned with the position of the eye (Figure 1a, g); indeed,  
324 Figure 1g shows that the inverted-straddler whiskers are arranged directly in front of the eyes  
325 and might help to protect this sensitive area.

326

### 327 **Extrinsic Muscles**

328 We next compare the extrinsic muscles of the *Monodelphis domestica* mystacial pad with  
329 those of the rat. The extrinsic muscles in the rodent mystacial pad have been called a variety  
330 of names; the terminology used here agrees with the nomenclature used by Hairdarliu et al.  
331 (2010), and also conforms to *Terminologia Anatomica* (1998).

332

333 *Superficial retracting muscles.* In the opossum, the most superficial muscles of the mystacial  
334 pad, are the *M. nasolabialis* and *M. maxillolabialis* (Figure 3) which both attach caudal to the  
335 mystacial pad. *M. nasolabialis* is a striated muscle (Figure 3a,b) that originates from the  
336 maxilla and os nasale, rostral to the orbit. It runs between the caudal part of the whisker rows.  
337 The *M. maxillolabialis* is also a striated muscle (Figure 3c,d) that is slightly deeper than the  
338 *M. nasolabialis*. It originates from the ventrocaudal part of the maxilla, and its fibres pass  
339 under the *M. nasolabialis* (Figure 3c), and then run rostrally, between the vibrissae rows,

340 from B to D. Contraction of these muscles pulls the corium of the mystacial pad caudally,  
341 causing a retraction of the vibrissae. This is similar to what has been observed in the rat  
342 (Haidarliu et al. 2010).

343

344 *Deep retracting muscles.* In the rat, the deep retracting muscles originate deep and rostral to  
345 the pad and then run most of the way down the entire pad, whereupon they insert deeply into  
346 the mystacial fibrous plate (Haidarliu et al. 2010). The three muscles have been named, in  
347 dorso-ventral order, as different parts of the *M. Nasolabialis profundus*—the *Pars interna*  
348 *profunda*, *Pars maxillaris superficialis* and *Pars maxillaris profunda*. The opossum similarly  
349 has three muscles also arranged dorso-ventrally that have very similar origins (Figure 4b).  
350 Since these appear to correspond to the same muscles as those of the rat it is appropriate to  
351 use the same nomenclature. All three *M. Nasolabialis profundus* muscles in opossum lie in a  
352 rostral-to-caudal direction and are connected to fibrous collagenous bundles situated between  
353 the vibrissal rows (Figure 4a, c, d). These bundles, which have been identified as collagen, as  
354 they possess a blue autofluorescence at a typical wavelength (Figure 4e, f), have rosette-like  
355 ends where they attach to the muscle fibres rostrally (Figure 4a, c, d, e) and belong to the  
356 three parts of the *M. nasolabialis profundus* (see also Figure 10b). *Pars interna profunda*  
357 attaches to a collagen bundle that runs between rows A and B, *Pars maxillaris superficialis*  
358 attaches to a collagen bundle that runs between rows B and C, and *Pars maxillaris profunda*  
359 attaches to a collagen bundle that runs between rows C and D (Figure 4f). Deep in the pad,  
360 the bundles contact the fibrous mat beneath the mystacial pad (Figure 4g). If these muscles  
361 contract, the collagenous bundles pull the mystacial fibrous plate rostrally, which should  
362 retract the vibrissae in much the same way as in the rat. In terms of their general appearance,  
363 these muscles in the opossum appear to have a similar function to those of the rat; however,  
364 they are much shorter and actuate the pad via collagen bundles, unlike in the rodent species  
365 where the muscles run the full length of the pad. This is therefore an important difference  
366 between the two species.

367

368 *Extrinsic protraction muscles.* A further set of mystacial muscles comprises the extrinsic  
369 protracting muscles which are also different parts of the *M. Nasolabialis profundus*. In  
370 opossum, the *Pars media superior* (PMS) and the *Pars media inferior* (PMI) originate rostral  
371 to the *Pars maxillaris profunda* origin from the septum intermusculare and rostral tip of the  
372 premaxilla (os incisivum) (Figure 5a and b). These attachment points are indicated by the  
373 black arrow in Figures 5a and 5b. These muscles are relatively short dorsoventrally (Wible,

374 2003) compared to the rat. Specifically, from their rostral attachment points, both muscle  
375 parts run caudally, between whisker rows A to D, until vibrissal arc 2 (Figure 5c). Figure 5c  
376 shows fragments of transected PMI and PMS which continue caudolaterally, and are inserted  
377 into the corium of the mystacial pad between all vibrissal rows and ventral to row D. In  
378 summary then, whereas in the rat the extrinsic protraction muscles are strongly inserted into  
379 the corium throughout every whisker row, in the opossum these muscles have a weaker  
380 presence throughout the pad and are absent from the more caudal sections.

381

### 382 **Genal Whiskers**

383 As well as the mystacial whiskers, the opossum also has genal whiskers. These are six  
384 whiskers that are arranged in a horseshoe-shape in the cheek area (Figure 6a). The genal  
385 whiskers have striated intrinsic muscles, but rather than being attached to each other, they are  
386 attached mostly to the skin superficial collagenous layer. Genal whisker follicles have a  
387 strong capsule, and can contain both cavernous (with mesh and trabeculae), and ring sinuses;  
388 sometimes the ringwulst can be observed.

389

### 390 **Behavioural consequences of differences in mystacial musculature**

391 We have described above several interesting differences in mystacial muscle groups in the  
392 opossum compared to those of the rat—in the intrinsic muscles, the deep retracting muscles  
393 and the extrinsic protracting muscles. We next compare rat and opossum behavioural data  
394 between regular (non-contact) whisking and contact episodes in order to establish whether  
395 there is any identifiable consequence of the differences in mystacial musculature on  
396 observable whisking and active sensing behaviour. In particular, we hypothesized that the  
397 different extrinsic muscle organisation in the two species might impact on their capacity to  
398 modify relative whisker movement velocities following contact, and so cause measurable  
399 differences in the angular spread of the whiskers. As described in the methods, we calculated  
400 the *mean angular whisker positions*, *mean angular spread*, *mean retraction velocity* and  
401 *mean protraction velocity* for 30 and 51 regular (non-contacting) whisking clips, and 23 and  
402 43 contact whisking clips, respectively, for rat and opossum. Traces from the raw  
403 behavioural data, shown in Figure 7(a,b), illustrate that during regular whisking bouts  
404 opossums move their whiskers in a sinusoidal, back-and-forth, pattern similar to that in the  
405 rat. In our previous analysis (Mitchinson et al., 2011) we found that rats whisk at a slightly  
406 higher frequency, during regular whisking episodes, compared to opossum (mean 8.7hz  
407 compared to 7.3hz) and with somewhat larger amplitudes (mean 43° compared to 36°). In

408 both species, the whiskers spread out more as they protract forward and bunch together as  
409 they retract (Figure 7c,d), this is likely to be largely as a consequence of the morphology of  
410 the system rather than due to active control (Grant et al., 2009).

411

412 Whereas the general form of whisking is similar in the two species during regular whisking  
413 bouts, in rat, there is a substantial decrease in angular spread of the whiskers following and  
414 during contact with an object (between ANOVA:  $F(1,52)=5.473$ ,  $p=0.023$ ), as shown in  
415 Figure 8a. This is consistent with our earlier study (Grant et al., 2009) and has also been  
416 noted in our laboratory to be a bilateral effect in this species (unpublished data). In  
417 comparison (see Figure 8a), there is no evidence of any change in spread in the opossum  
418 following contact with an object (between ANOVA:  $F(1,93)=0.013$ ,  $p=0.910$ ). Similarly, as  
419 shown in Figure 8b, there is also a large decrease in retraction velocity following contact with  
420 a vertical surface in rat (between ANOVA:  $F(1,54)=4.813$ ,  $p=0.033$ ) which is not matched in  
421 opossums (between ANOVA:  $F(1,95)=0.316$ ,  $p=0.575$ ). There are no significant differences  
422 in whisker protraction velocities (8c) and set-point (the average mean angular position, see  
423 8d) between regular whisking and contact whisking in either species. Example digital video  
424 frames, shown in Figure 9, further illustrate that whilst the rats reduce their whisker spread  
425 following a contact, in opossums, whisker spread remains largely unchanged during object  
426 exploration.

427

428 As shown in Figure 6, the genal whiskers, which can be clearly seen at the caudal edge of the  
429 cheek in Figure 9(b,d), themselves have sling-like muscles with some similarities to those  
430 that move the macrovibrissae. To evaluate the capacity for independent movement in these  
431 whiskers we examined 12 exemplar clips of opossum regular whisking. During bouts of  
432 whisking with the mystacial vibrissae typically also saw some lower-amplitude sinusoidal  
433 motion in the tracked genal whisker as illustrated in Figure 10. Genal whisker motion was  
434 largely synchronized with movement of the mystacial vibrissae, however, macrovibrissal  
435 movement does not appear to entail movement of the genal whiskers as illustrated in Figure  
436 10 where there are whisk cycles during which the macrovibrissae move sinusoidally but the  
437 tracked genal whisker does not. This finding is consistent with the genal whisker motion  
438 being driven, at least in part, by its own intrinsic muscle.

439

440 **Discussion**

441 The opossum mystacial pad has a grid-like follicle layout, with nasal and maxillary  
442 compartments. There are fewer whisker rows than in rat, however, in both species the  
443 whiskers are coupled together within rows by horizontal intrinsic muscles, a distinctive  
444 pattern suggesting that a similar arrangement may have existed in an early mammalian  
445 common ancestor. Similarly, opossums and rats also have generally similar extrinsic  
446 musculature that can reshape the mystacial pad and drive whisker retraction and protraction  
447 movements.

448

449 We also noted some interesting differences between the rat and opossum vibrissal  
450 musculature. First, we found oblique intrinsic muscles in the opossum that have not been  
451 described in any other species. Second, we found whiskers that are connected to each other  
452 by a distinctive arrangement of intrinsic muscles, that we term inverted-straddlers, since this  
453 reverses (rostrocaudally) a pattern seen in rats. The superficial extrinsic muscles were  
454 generally similar to those observed in rats, but the deep retracting and extrinsic protracting  
455 muscles appeared to be considerably less well-developed in the opossum, contributing to the  
456 overall appearance of the mystacial pad as less substantial in opossum compared to rat.  
457 Indeed, within the opossum mystacial pad, muscle territory is reduced, whilst collagen  
458 representation is relatively enriched compared with the whisker pad in the rodent species.

459

460 Some of these differences in mystacial musculature seem likely to relate to qualitative  
461 differences in the capacity of the animal to control their whiskers during active sensing  
462 behaviours. In particular, analyses of rat whisking during exploration of objects, here and in  
463 Grant et al. (2009), have shown that these animals have the capacity to reduce the angular  
464 spread of their whiskers in a manner that increases whisker tip contact with surfaces of  
465 interest. In the analysis of opossum whisking behaviour reported above we found no evidence  
466 of a similar capacity in this species, suggesting that this may have evolved separately within  
467 the lineage of modern rodents.

468

469 **Comparisons with other species**

470 Figure 11 summarises the arrangement of the opossum snout muscle system, we next discuss  
471 some similarities and differences to other mammalian species in which the whiskers and  
472 facial musculature have been investigated.

473

474 *Organisation of the facial vibrissae*

475 The layout of the opossum mystacial pad is quite similar to that of the wallaby (Waite et al.  
476 2006) as there seem to be four rows of vibrissae in both species, with two nasal whiskers  
477 present in the dorsal-most row. Weller (1993) also found two dorsal-most whiskers in brush-  
478 tailed opossums, however, that study reported six rows of whiskers in total (or five if their  
479 row A is labelled as nasal whiskers). It seems possible that the relatively large size of the  
480 furry buccal pad whiskers might lead them to be confused with the mystacial whiskers,  
481 indeed, Weller (1993) described the whiskers in the lower rows as “numerous and difficult to  
482 count” (p. 21). By looking at the muscles of the pad it is possible to clearly distinguish the  
483 mystacial whiskers from the nasal whiskers and furry buccal pad. If these whiskers have been  
484 mis-labelled as mystacial pad whiskers in the Weller study then it would appear that the  
485 opossum does have a very similar whisker layout to other marsupials in which the whiskers  
486 have been investigated.

487

488 Compared to other mammals in which whisking has been recorded (see Mitchinson et al.,  
489 2011) the opossum has relatively few whiskers, indeed far less than hamsters (Wineski 1985;  
490 Haidarliu et al. 1997), rats (Haidarliu et al. 2010), mice (Dorfl, 1982) and shrews (Kulikov,  
491 2011). Amongst rodents, the layout of the guinea pig mystacial pad is perhaps more similar to  
492 the opossum (Haidarliu et al. 1997), containing a row of nasal whiskers and only two  
493 whiskers in row A.

494

495 *Intrinsic musculature*

496 Intrinsic muscles that couple rostral and caudal whiskers within the same row have also been  
497 described in mice (Dörfl 1982), hamsters (Wineski 1985), guinea pigs (Haidarliu et al. 1997),  
498 rats (Haidarliu et al. 2010) and shrews (Yohro 1977), lending confidence to the view that this  
499 may be a primitive mammalian trait. A new finding in the opossum is the layout of the  
500 inverted-straddlers in the dorso-caudal area of the pad, and the presence of oblique intrinsics  
501 muscles in the two dorsal whisker rows. In a study of big-clawed shrew, Yohro (1977) also  
502 found differences in the dorsal and ventral whisker rows but with the ventral whiskers having  
503 more muscles “straddling” between whisker rows. We might expect to find variations in this  
504 part of the pad in other species, and in the future it might be interesting to attempt to relate  
505 these differences to behavioural specialisations. Here, we also found differences between the  
506 dorsal and ventral whisker layouts suggesting compartmentalisation of the pad.



507 Compartmentalisation in mice was described by Yamakado and Yohro (1979), who identified  
508 a nasal compartment (rows A and B) and a maxillary compartment (ventral rows) of  
509 whiskers that develop from different growth centres in embryo. Different growth centres are  
510 also likely to be responsible for the nasal and maxillary divisions in the opossum pad too, and  
511 so potentially this might be a primitive mammalian feature.

512

513 A further novel finding in opossum are the bundles of intrinsic muscles in row A and B that  
514 originate from the ventral surface of the rostral whisker capsule and are inserted into the  
515 dorsal surface of the neighbouring caudal whisker. The position and attachment of these  
516 muscles suggest that they cause a torsional rotation of whisker rows A and B. Torsional  
517 rotation of whiskers in rat was first described by Knutsen et al. (2008) who proposed that  
518 torsional movements could allow ventral whisker rows to scan downwards whilst dorsal  
519 whisker rows scan upwards. As we were only filming from above in the current study we are  
520 unable to make estimates of the torsional rotation of whiskers, however, based on the muscle  
521 layout in opossum it seems possible that the dorsal two rows may rotate more than the two  
522 more ventral rows.

523

#### 524 *Extrinsic musculature*

525 Superficial extrinsic muscles that drive retraction movements of the vibrissae, and similar to  
526 those seen in opossum, have been described in hamsters (Wineski 1985), mice (Dorfl 1982,  
527 Klingener 1964), rats (Haidarliu et al. 2010), jerboas (Klingener 1964), didelphid opossums  
528 (Minkoff et al. 1979) and shrews (Yohro 1977). However, in the big-clawed shrew, the  
529 striated *M. nasolabialis superficialis* is also associated with smooth muscle fibres just  
530 beneath the corium (Yohro 1977), unlike the rat and opossum, suggesting that there are  
531 variations in extrinsic musculature between different species.

532

533 The different components of the *M. nasolabialis profundus* muscle group have been  
534 described in mouse (Dorfl 1982, Klingener 1964, Rinker 1954), hamster (Wineski 1985) and  
535 rat (Haidarliu et al. 2010, Rinker 1954). The deep retracting muscles of the *M. nasolabialis*  
536 *profundus* can be slightly different in placement or characteristics between rodent species  
537 (Wineski 1985, Haidarliu et al. 2010), however, in general, these muscles pull the deep layers  
538 of the whisker pad forward, so that the whiskers are retracted back. In rat, whisker retractions  
539 are found to be faster than protraction movements, and both types of movement may be  
540 actively controlled (Berg and Kleinfeld 2003). For instance, Grant et al. (2009) found that,

541 following a contact, whisker retraction velocities slowed down in the subsequent whisk cycle.  
542 In opossum the equivalent deep retraction muscles are relatively reduced and attach rostrally  
543 to collagen fibers. This difference in musculature possibly also explains the lack of retraction  
544 velocity control when the opossum explores objects.

545

546 The extrinsic protracting muscles also vary between rodent species (Rinker 1954, Klingener  
547 1964), in placement especially. In some rodents they have been described as having  
548 characteristics similar to the superficial extrinsic muscles (Rinker 1954, Klingener 1964),  
549 being flat and running in the same plane. However, Dorfl (1982) and Haidarliu et al (2010),  
550 have found them to run in a different plane. Dorfl (1982) found the muscles to insert between  
551 the five rows of follicles in mouse, whereas Haidarliu et al. (2010) found them to be present  
552 in rat, between the five whisker rows and also dorsal and ventral to the whisker rows. In the  
553 opossum we see that they run between rows A-B, B-C, C-D and also lie ventral to row D.  
554 Haidarliu et al. (2010) used the term “focusing” to describe the extrinsic protracting muscles,  
555 hypothesising that they help bring about the reduction in rostrocaudal spread of the whisker  
556 field that has been described during foveal whisking (Berg and Kleinfeld 2003) and surface  
557 investigation (Grant et al. 2009, 2012). That the opossum does not appear to reduce whisker  
558 spread during object exploration could be due to a number of differences in these muscles.  
559 First, the difference in attachment positions of the muscles between rodents and opossums  
560 might cause changes in spread reduction behaviour, a comparison between the attachment  
561 sites can be seen in Figure 12). Second, the muscle bundles in the opossum appear to be  
562 weaker, or attached partially to other places, which could change the direction of the muscle  
563 fibres. Overall this could reduce the capability to reshape the mystacial pad in a manner that  
564 could be used to bring the whiskers closer together.

565

#### 566 *Genal whiskers*

567 Many orders of mammals have genal whiskers, including marsupials (e.g. the gray short-  
568 tailed and Virginia opossums and the Tasmanian devil), edenta (e.g. hairy armadillos),  
569 insectivora (e.g. tenrecs), chiroptera (e.g. bats), primates (e.g. lemurs, aye ayes), carnivora  
570 (e.g. jackals) and rodents (e.g. dormice) (Pocock 1914). However, their position on the face  
571 and the number of whisker can vary immensely. In *Monodelphis domestica* we usually see  
572 six genal whiskers positioned mid-way between the edge of the mouth and the bottom of the  
573 ear, well below the eye. During macrovibrissal whisking we have seen evidence of smaller  
574 amplitude movements in the genal whiskers largely synchronised with those of the

575 macrovibrissae. We believe this is the first report of sinoidal whisker motions in non-  
576 mystacial whiskers. In the current study we have also shown that these whiskers have sling  
577 muscles, similar to those involved in protracting the mystacial vibrissae, and suggesting that  
578 genal whisker movements may be actively generated rather than simply being a consequence  
579 of the movement of the extrinsic musculature of the nearby mystacial pad. Genal intrinsic  
580 muscles attach to the skin rather to other whisker follicles. During evolution of the mystacial  
581 whiskers it seems plausible that sling-like muscles, that originally anchored the whiskers to  
582 the skin, may have adapted to attach themselves to neighbouring follicles along the principle  
583 axis of whisker motion. Simulation results from Simony et al. (2010) show that contraction of  
584 an intrinsic muscle in the rat causes movement of both attached whiskers. The evolutionary  
585 step of chaining the intrinsic muscles would therefore have enhanced their effectiveness in  
586 protracting the mystacial whiskers whilst also providing a stronger coupling of the movement  
587 of adjacent vibrissae.

588

### 589 **Broader implications for understanding mammalian evolution**

590 The presence of whisking in both rodents and marsupials, shown in our earlier study  
591 (Mitchinson et al. 2011) implies that a common ancestor to all modern therians (marsupial  
592 and placental mammals) may have also employed active vibrissal sensing. The current study  
593 provides compelling new evidence that whisking in rodents and marsupials uses similar  
594 underlying mechanisms and is therefore unlikely to be convergent but an inherited trait, in  
595 other words, that early mammals were also whisking animals.

596 If active vibrissal sensing was present at an early stage in the evolution of modern mammals  
597 then it will have had greater impact on the broader course of mammalian evolution than has  
598 hitherto been realized. Indeed, if early mammals actively moved their vibrissae, then this has  
599 important implications for many other aspects of mammalian evolution. For instance, the  
600 evolution of whisking musculature will have strongly shaped the broader evolution of the  
601 muscles of the face (see Huber, 1930). Further, the need to control the movement of the  
602 vibrissae will have brought about changes in sensorimotor circuits in the brain. Interestingly,  
603 the opossum cortex lacks a distinct motor area, and the only area of the body in which  
604 movement can be elicited by direct cortical microstimulation appears to be the vibrissal region  
605 around the snout (Frost, et al., 2000). If this represents an ancestral condition it suggests that  
606 the vibrissae musculature may have been one of the first, if not the first, area of the motor  
607 system to have come under cortical control. Cortical influence on movement generally arises

608 where more sophisticated patterns of control are needed than can be realised by brainstem or  
609 spinal circuits. Our results suggest the intriguing possibility that active vibrissal sensing may  
610 therefore have been a key driver for the evolution of cortical motor control in early mammals.

611

612 Opossums are generalists, having excellent eye-sight and hearing, whereas rats are more  
613 specialised towards tactile sensing having a comparatively poor visual sense. In progressing  
614 to become more of a specialist in vibrissal sensing, rodents such as the rat appear to have  
615 evolved a modified configuration of the snout and whiskers (compare e.g. Figures 9a and 9b)  
616 in which, in addition to an increased number of whiskers and new degrees of freedom of  
617 whisker movement (spread control), the snout has become visibly shorter and blunter.  
618 Simulation and robotic studies (e.g. Prescott et al., 2009; Pearson et al., 2011; Towal et al.,  
619 2011) have shown that the morphology of the snout and vibrissal array shapes a sensory  
620 surface formed by the whisker tips and so helps determine the nature of the information that  
621 can be obtained by animal. Moving from a more conical snout, as seen in the opossum, to the  
622 rounder shape of the rat, and adding additional macro- and microvibrissae, alters the shape of  
623 this surface and, in particular, substantially enhances the capacity of the animal to explore,  
624 through vibrissal touch, the area in front of the head and around the snout tip.

625

## 626 **Conclusion**

627 The gray short-tailed opossum, *Monodelphis domestica*, engages in active vibrissal sensing  
628 behaviours that have also been described in mice and rats. We found that the mystacial  
629 muscle system of the opossum is very similar to that of rodent whisker specialists, containing  
630 the four key muscle groups: the intrinsics, the superficial extrinsics, the deep retracting and  
631 the extrinsic protracting muscles. Similarities in whisking behaviour, and mystacial pad  
632 morphology and musculature, between these distantly related species lends confidence to the  
633 view that a common ancestor of modern therian mammals possessed an active vibrissal  
634 sensing system.

635

## 636 **Acknowledgements**

637 The authors would like to thank Antonello Mallamachi and Marco Stebel for providing  
638 access to the opossum colony at the University of Trieste animal facility, and Sandra Digby  
639 and Clare Brazill-Adams from the National Institute for Medical Research for providing

640 additional samples of opossum tissues. Video analysis was performed using the BIOTACT  
641 Whisker Tracking Tool which was jointly created by the International School of Advanced  
642 Studies, the University of Sheffield, and the Weizmann Institute of Science under the  
643 auspices of the FET Proactive project FP7 BIOTACT project (ICT 215910), which also  
644 funded the study. The authors are grateful to Ben Mitchinson who helped develop the high-  
645 speed video recording system and whisking analysis tools, Kendra Arkley who assisted in  
646 collecting the opossum data, and Len Hetherington who helped prepare the microscope  
647 images. Our understanding of the vibrissal musculature has also benefited from discussions  
648 with Ehud Ahissar, David Golomb, and other members of the BIOTACT project.

## 649 **Funding**

650 This study was funded by the FET Proactive project FP7 BIOTACT project (ICT 215910).  
651 Additional financial support was provided by the Weizmann-UK joint research programme.

## 652 **References**

- 653 **Ahl, A. S.** (1986). The role of vibrissae in behavior, a status review. *Veterinary Research*  
654 *Communications*, **10**(4), 245-68.
- 655
- 656 **Berg, R.W., & Kleinfeld, D.** (2003). Rhythmic whisking by rat, retraction as well as  
657 protraction of the vibrissae is under active muscular control. *J Neurophysiol* **89**, 104–117.
- 658
- 659 **Diogo, R.** (2009). The head and neck muscles of the Philippine calugo (Dermoptera,  
660 *Cynocephalus volans*), with a comparison to tree-shrews, primates, and other mammals. *J*  
661 *Morphol* **270**, 14-51.
- 662
- 663 **Dorfl, J.** (1982). The musculature of the mystacial vibrissae of the white mouse. *J Anat* **135**,  
664 147–154.
- 665
- 666 **Filan S.L.** (1990). Myology of the head and neck of the bandicoot (Marsupialia,  
667 *Peramelemorphia*). *Aust J Zool* **38**, 617-634.
- 668
- 669 **Frost, S.B., Milliken, G.W., Plautz, E.J., Masterton, R.B. & Nudo, R.J.** (2000).  
670 Somatosensory and motor representations in cerebral cortex of a primitive mammal

671 (*Monodelphis domestica*), a window into the early evolution of sensorimotor cortex. *J.*  
672 *Comp. Neurol.* **421**, 29-51  
673  
674 **Grant, R., Mitchinson, B., Fox, C., & Prescott, T.J.** (2009). Active touch sensing in the rat,  
675 Anticipatory and regulatory control of whisker movements during surface exploration.  
676 *Journal of Neurophysiology*, **101**, 862-874  
677  
678 **Grant, R.A., Mitchinson, B., & Prescott, T.J.** (2012). The development of whisker control  
679 in rats in relation to locomotion. *Developmental Psychobiology*, **54**(2), 151-168  
680  
681 **Haidarliu, S., & Ahissar, E.** (1997). Spatial organization of facial vibrissae and cortical  
682 barrels in the guinea pig and golden hamster. *J Comp Neurol* **385**, 515–527.  
683  
684 **Haidarliu, S., Simony, E., Golomb, D., & Ahissar, E.** (2010). Muscle architecture in the  
685 mystacial pad of the rat. *Anat. Rec.* **293**, 1192-1206  
686  
687 **Haidarliu, S., Golomb, D., Kleinfeld, D. & Ahissar, E.** (2012). Dorsorostral snout muscles  
688 in the rat subserve coordinated movement for whisking and sniffing. *Anat. Rec.* **295**, 1181-  
689 1191  
690  
691 **Huber, E.** (1930) Evolution of the facial musculature and cutaneous field of the trigeminus.  
692 *1. Q. Rev. Biol.* **5**, 133–188.  
693  
694 **Huber, E.** (1931). Evolution of facial musculature and facial expression. Baltimore, The  
695 Johns Hopkins press. 184 p.  
696  
697 **Ji, Q., Luo, Z. X., Yuan, C. X., Wible, J. R., Zhang, J. P., Georgi, J. A.** (2002). The  
698 earliest known eutherian mammal. *Nature*, **416** (6883), 816-22.  
699  
700 **Klingener, D.** (1964). The comparative myology of four dipodoid rodents (Genera *Zapus*,  
701 *Napeozapus*, *Sicista*, and *Jaculus*). *Misc Publ Mus Zool Univ Michigan* **124**, 1–100.  
702  
703 **Knutsen, P.M., Biess, A., & Ahissar, E.** (2008). Vibrissal kinematics in 3D, tight coupling  
704 of azimuth, elevation, and torsion across different whisking modes. *Neuron*, **59**(1), 35-42

705

706 **Kulikov, V.F.** (2011). A New Vibrissa Group in Insectivores (Mammalia, Insectivora) and  
707 Its Role in Orientation. *Doklady Bio. Sci.* **438**, 154-157.

708

709 **Lightoller, G.S.** (1940). The comparative morphology of the *M. caninus*. *J Anat* **74**, 397-402.

710

711 **Luo, Z. X.** (2007). Transformation and diversification in early mammal evolution. *Nature*,  
712 **450**(7172), 1011-9.

713

714 **Luo, Z. X., Yuan, C. X., Meng, Q., Ji, Q.** (2011). A Jurassic eutherian mammal and  
715 divergence of marsupials and placentals. *Nature*, **476**(7361), 442-445.

716

717 **Maderson, P. F. A.** (1972). When? Why? and How?, Some Speculations on the evolution of  
718 the vertebrate integument. *American Zoologist*. **12** (1), 159-171.

719

720 **Maderson P. F. A.** (2003). Mammalian skin evolution, a reevaluation. *Experimental*  
721 *Dermatology*, **12**(3), 233-6.

722

723 **Minkoff, E.C., Mikkelsen, P., Cunningham, W.A., & Taylor, K. W.** (1979) The facial  
724 musculature of the opossum (*Didelphis virginiana*). *J. Mammalogy*. **60**(1), 46-57

725

726 **Mitchinson, B., Martin, C. J., Grant, R. A., & Prescott, T. J.** (2007). Feedback control in  
727 active sensing, rat exploratory whisking is modulated by environmental contact. *Royal*  
728 *Society Proc (B) Biol. Sci.*, **274**(1613), 1035-1041.

729

730 **Mitchinson, B., Grant, R.A., Arkley, K.P., Perkon, I., & Prescott, T.J.** (2011). Active  
731 vibrissal sensing in rodents and marsupials. *Philosophical Transactions B*. **366**(1581), 3037-  
732 3048

733

734 **Pearson, M.J., Mitchinson, B., Sullivan, J.C., Pipe, A.G., and Prescott, T.J.** (2011).  
735 Biomimetic vibrissal sensing for robots. *Philos Trans R Soc Lond B Biol Sci*. **366**, 3085-  
736 3096.

737

738 **Perkon, I., Kosir, A., Itskov, P.M., Tasic, J. & Diamond, M.E.** (2011). Unsupervised  
739 quantification of whisking and head movement in freely moving rodents. *J. Neurophys.*  
740 **105**(4), 1950-1962  
741  
742 **Pocock, R. I.** (1914). On the facial vibrissae of mammalia. *Proc. Zool. Soc. Lond.* **84**, 889–  
743 912.  
744  
745 **Prescott, T.J., Pearson, M.J., Mitchinson, B., Sullivan, J.C.W., and Pipe, A.G.** (2009).  
746 Whisking with robots, From rat vibrissae to biomimetic technology for active touch. *IEEE*  
747 *Robotics & Automation Magazine* **16**, 42-50.  
748  
749 **Prescott, T.J, Diamond, M.E. & Wing, A.M.** (2011). Active touch sensing. *Philosophical*  
750 *Transactions B.* **366**(1581), 2989-2995  
751  
752 **Rinker, G.C.** (1954). The comparative myology of the mammalian genera *Sigmodon*,  
753 *Oryzomys*, *Neotoma*, and *Peromyscus* (*Cricetinae*), with remarks on their intergeneric  
754 relationships. *Misc Publ Mus Zool Univ Michigan* **83**, 1–25.  
755  
756 **Simony, E., Bagdasarian, K., Herfst, L., Brecht, M., Ahissar, E., and Golomb, D.** (2010).  
757 Temporal and spatial characteristics of vibrissa responses to motor commands. *Journal of*  
758 *Neuroscience* **30**, 8935-8952.  
759  
760 **Towal, R.B., Quist, B.W., Gopal, V., Solomon, J.H., and Hartmann, M.J.** (2011). The  
761 morphology of the rat vibrissal array, a model for quantifying spatiotemporal patterns of  
762 whisker-object contact. *PLoS Comput Biol* **7**, e1001120.  
763  
764 **Rowe, T.B., Macrini, T.E., Zhe-Xi, L.** (2011) Fossil evidence on origin of the mammalian  
765 brain. *Science.* **332**, 995-957  
766  
767 Terminologia Anatomica. (1998). Federative committee on anatomical terminology.  
768 Stuttgart, Georg Thieme.  
769  
770 **Wagner, A.** (1842). Diagnosen neuer Arten brasilischer Säugthiere. *Archiv für*  
771 *Naturgeschichte* **8**(1), 356–362.



772

773 **Waite, P.M.E., Gorrie, C.A., Herath, N.P., & Marotte, L.R.** (2006). Whisker maps in  
774 marsupials, nerve lesions and critical periods. *Anat. Rec.* **288A**, 174-181

775

776 **Weller, W.L.** (1993). SmI Cortical Barrels in an Australian Marsupial, *Trichosurus*  
777 *vulpecula* (Brush-Tailed Possum), Structural Organization, Patterned Distribution, and  
778 Somatotopic Relationships. *J. Comp. Neurol.* **337**, 471-492

779

780 **Whidden, H.P.** (2002) Extrinsic musculature in Afrotheria and Lipotyphla. *J Mammal Evol*  
781 **9**, 161-184.

782

783 **Wible, J.R.** (2003) On the cranial osteology of the short-tailed opossum *Monodelphis*  
784 *brevicaudata* (Didelphidae, Marsupialia)..*Annals Carnegie Museum* **72**, 137-202.

785

786 **Wineski, L.E.** (1985) Facial morphology and vibrissal movement in the golden hamster. *J*  
787 *Morphol* **183**, 199–217.

788

789 **Yamakado, M., & Yohro, T.** (1979). Subdivision of mouse vibrissae on an embriological  
790 basis, with descriptions of variations in the number and arrangement of sinus hairs and  
791 cortical barrels in BALB/c (nu/p; nude, nu/nu) and hairless (hr/hr) strains. *Am J Anat* **155**,  
792 153–174.

793

794 **Yohro, T.** (1977). Arrangement and structure of sinus hair muscles in the  
795 big-clawed shrew, *Sorex unguiculatus*. *J. Morphol.* **153**(2), 317-331.

796

797

798

799 FIGURE LEGENDS

800

801 **Figure 1. The layout of the *Monodelphis domestica* mystacial pad in comparison to that of the**  
802 **rat.** (a) Photograph of the possum head, the mystacial pad (whiskers removed) is highlighted in the  
803 black box. (b) Photograph of the rat head, mystacial whiskers and pad highlighted in the black box.  
804 (c) A map of the macrovibrissal follicles revealed in ethanol/xylene-cleared entire snout preparation in  
805 the opossum. The furry buccal pad (FBP) is indicated. (d) A map of the macrovibrissal follicles

806 revealed in ethanol/xylene-cleared entire snout preparation in the rat (adapted from Haidarliu et al.  
807 2010). NV is nasal vibrissae, NS in nostril. (e) A slice of the opossum mystacial pad, stained for  
808 cytochrome oxidase activity and revealing the sling-like intrinsic musculature. (f) A slice of the rat  
809 mystacial pad, stained for cytochrome oxidase activity (adapted from Haidarliu et al. 2010), N is  
810 nostril. (g) Close-up of the opossum whisker layout from the front (h) Close-up of the rat whisker  
811 layout from the front.

812 **Figure 2. Opossum intrinsic musculature.** (a) General layout of the intrinsic muscles. (b) A close-  
813 up of the  $\alpha$  and  $\beta$  “inverted-straddlers” whisker B1 can be seen to be straddling  $\alpha$  and  $\beta$  (see also panel  
814 c). (c) Oblique intrinsic muscles—as well as the horizontal fascicles (HF) of the intrinsic muscles,  
815 there are also the oblique fascicles (OF) that connect, for example, the ventral capsular surface of A1  
816 with the dorsal capsular surface of A0. Scale bars are 1mm.

817 **Figure 3. Opossum superficial muscles *M. nasolabialis* (NL) and *M. maxillolabialis* (ML)** (a)  
818 Attachment of NL to the mystacial pad. (b) Close-up of the striated NL muscle. (c) NL and ML can  
819 both be seen in a more superficial slice than that in panel b. (d) Close-up of the striated ML muscle  
820 fibres.

821 **Figure 4. Deep retracting vibrissal muscles in the opossum.** (b) View of the of the mystacial pad  
822 around the nose, showing the deep retracting muscles *Pars interna Profunda* (PIP), *Pars maxillaris*  
823 *profunda* (MP) and *Pars maxillaris superficialis* (MS). (a, c-d) Close-ups at different levels through  
824 the pad of PIP, MS and MP, respectively, attached to their corresponding collagen fibres. (e) Close-up  
825 of the collagen bundle attaching to the PIP muscle by rosette-like endings prepared using blue  
826 collagen autofluorescence. (f) Muscle attachment to collagen bundles between the rows a-b, b-c and  
827 c-d shown using blue collagen autofluorescence. (g) PIP collagen fibers and the MS collagen fibres  
828 inserting into the collagen mat. These fibres attach to the muscles and insert into the deep collagen  
829 fibrous mat so that the whole pad is moved when the muscles protract.

830 **Figure 5. Opossum extrinsic protracting muscles.** (c) Picture of an intermediate tangential layer of  
831 the pad showing *Pars media inferior* (PMI) and *Pars media superior* (PMS). PMS intercepts between  
832 rows A-B and B-C. PMI intercepts between rows B-C and C-D. a): PMS muscle attachment; b): PMI  
833 muscle attachment.

834 **Figure 6. Opossum genal whiskers.** (a) Genal whisker arrangement from tangential slices. The genal  
835 whisker area can be seen clearly in Figure 1a. (b) Ethanol/xylene-cleared preparation showing genal  
836 whiskers arranged in an approximately vertical row. (c) Close-up of the genal follicle showing a  
837 ringwulst and ring sinus. (d) Sling muscles on the genal whiskers, of which the extremities are  
838 inserted dorsocaudally into the corium.

839 **Figure 7. Examples of rat and opossum whisker movements during movement across a smooth**  
840 **surface (regular whisking).** (a, b) Mean angular position of the left (blue) and right (green) whisker  
841 fields over the course of three whisk cycles. (c, d) Changes in angular spread of the whiskers over the  
842 course of the same three whisk cycles. In both species, spread is strongly correlated to angular  
843 position such that whiskers spread out as they are protract forward.

844 **Figure 8. Comparing whisking behaviour in regular and contacting whisking bouts in rats and**  
845 **opossums.** (a) Mean angular spread (estimated by standard deviation of whisker angular positions) of  
846 the rat and opossum whiskers, in episodes of regular whisking and contact whisking. Rats  
847 significantly reduce their spread when they contact a surface, whereas there is no significant  
848 difference in possums. (b) Mean retraction velocity is also significantly decreased during contact in  
849 rat, but not in opossum, suggesting that differential control of whisker velocity may underlie the  
850 change in whisker spread. (c, d) Mean whisker protraction velocity and set-point (average of the mean  
851 whisker position) are not altered significantly between regular and contact whisking in either species.

852 **Figure 9. Effect of surface contact on whisker spread in rat (left) and opossum (right).** These  
853 digital video frames were selected to show the whiskers at maximum protraction during movement  
854 across a smooth floor (a, b), or after contact with a vertical surface (c, d). In rats, there is a visible  
855 reduction in whisker spread following contact with surfaces suggesting that the whiskers are brought  
856 closer together in order to increase the number of surface contacts. In opossum there was no evidence  
857 of a similar reduction in whisker spread, suggesting that these animals lack the capability to control  
858 the whiskers in this fashion. Note that head movement can cause changes in apparent spread viewed  
859 from an overhead camera, in Grant et al. (2009) changes in whisker spread in rat were shown to be  
860 significant after controlling for changes in head tilt. This figure also illustrates the difference in  
861 vibrissal morphology between the rat and opossum, with the rat lacking the prominent genal vibrissae  
862 seen in the opossum but possessing a rounder, blunter snout that can provide better coverage, by the  
863 whiskers, of the region in front of the animal (see Discussion).

864 **Figure 10. Movement of the opossum genal whiskers.** Two manual tracking examples (a and b).  
865 Two macrovibrissae (blue—left whisker field, green—right whisker field) and one genal whisker  
866 (red) during two episodes of regular whisking. The genal whisker moves synchronously with the  
867 macrovibrissae, but at a lower amplitude, during some, but not all, whisk cycles.

868  
869 **Figure 11. Schematic representation of the mystacial pad muscles in the opossum *Monodelphis***  
870 ***domestica*.** (a) Intrinsic muscles. FBP, furry buccal pad; NV, nasal vibrissae; OI, and RI, oblique and  
871 regular intrinsic muscles, respectively; marked black circles represent mystacial vibrissae. (b)  
872 Extrinsic muscles. FB, fibrous bundles passing between vibrissal rows; FE, fibrous extensions  
873 (branches) connecting FB with vibrissal follicles; ML, *M. maxillolabialis*; MP, MS and PIP, *Partes*

874 *maxillares profunda* and *superficialis*, and *Pars interna profunda* of the *M. nasolabialis profundus*,  
875 respectively; NL, *M. nasolabialis*; SA, sites of attachment of ML and NL muscle fibre ends to the  
876 corium of the mystacial pad; other figure labels as in a).

877 **Figure 12. Rostral skull sections of the skull (a) in rat and (b) in opossum.** PM is premaxilla and  
878 A is the attachment place of Partes mediae superior et inferior. (b) is based on Figure 1a in Wible  
879 (2003) pg. 72. The difference in the positioning of the attachment sites of PMS and PMI in opossum,  
880 compared to rat, could explain the absence of the spread reduction behaviour.

881

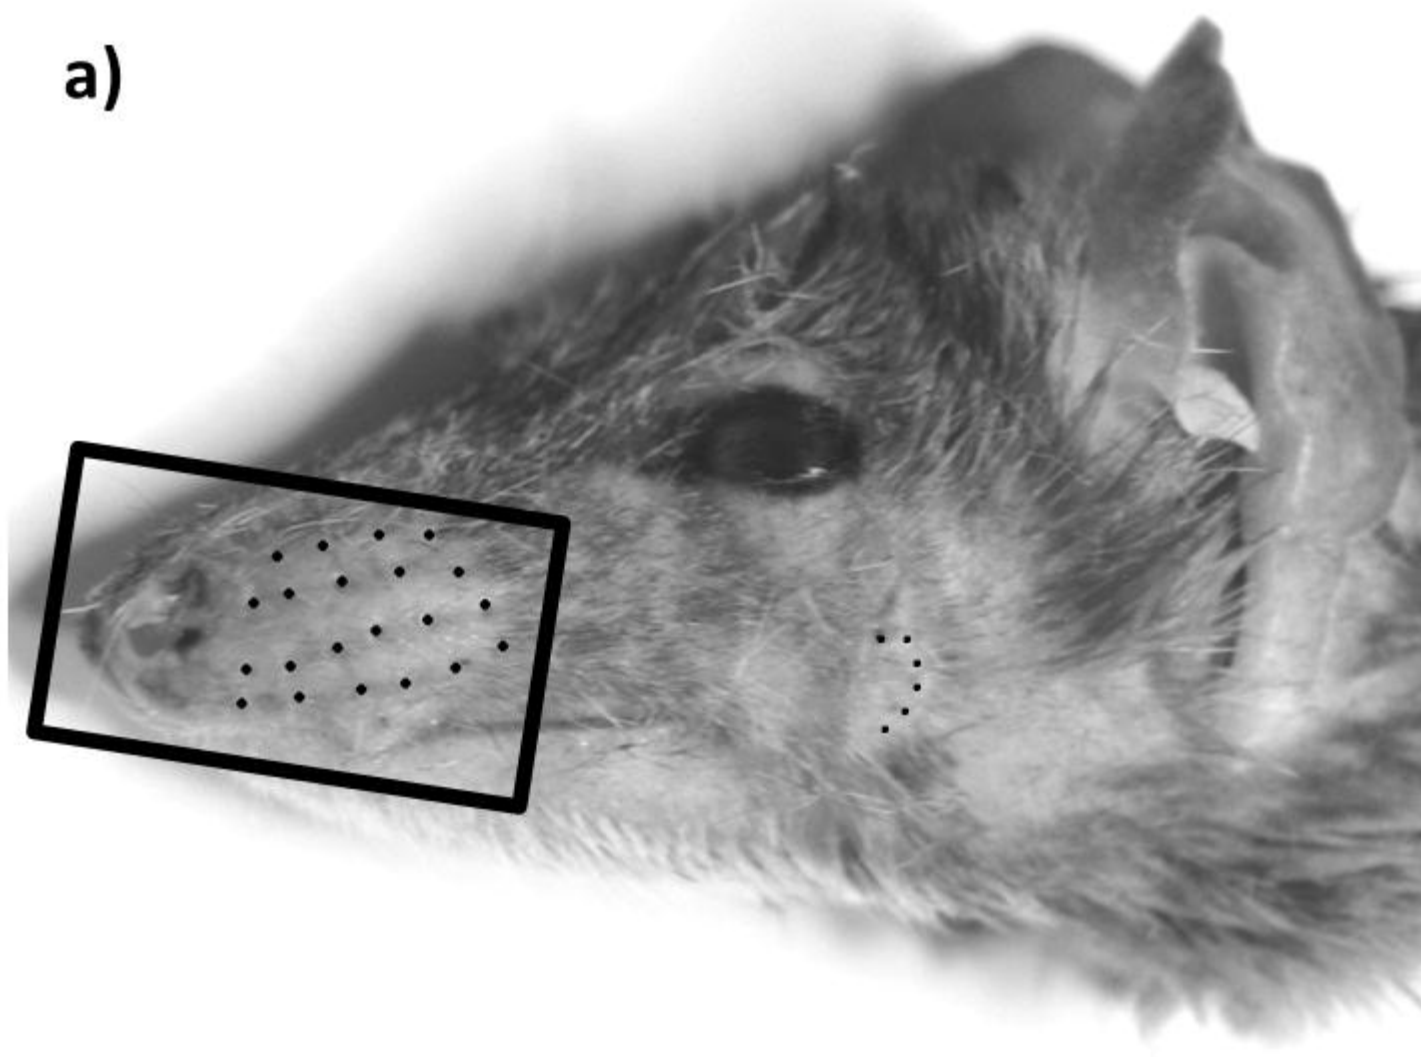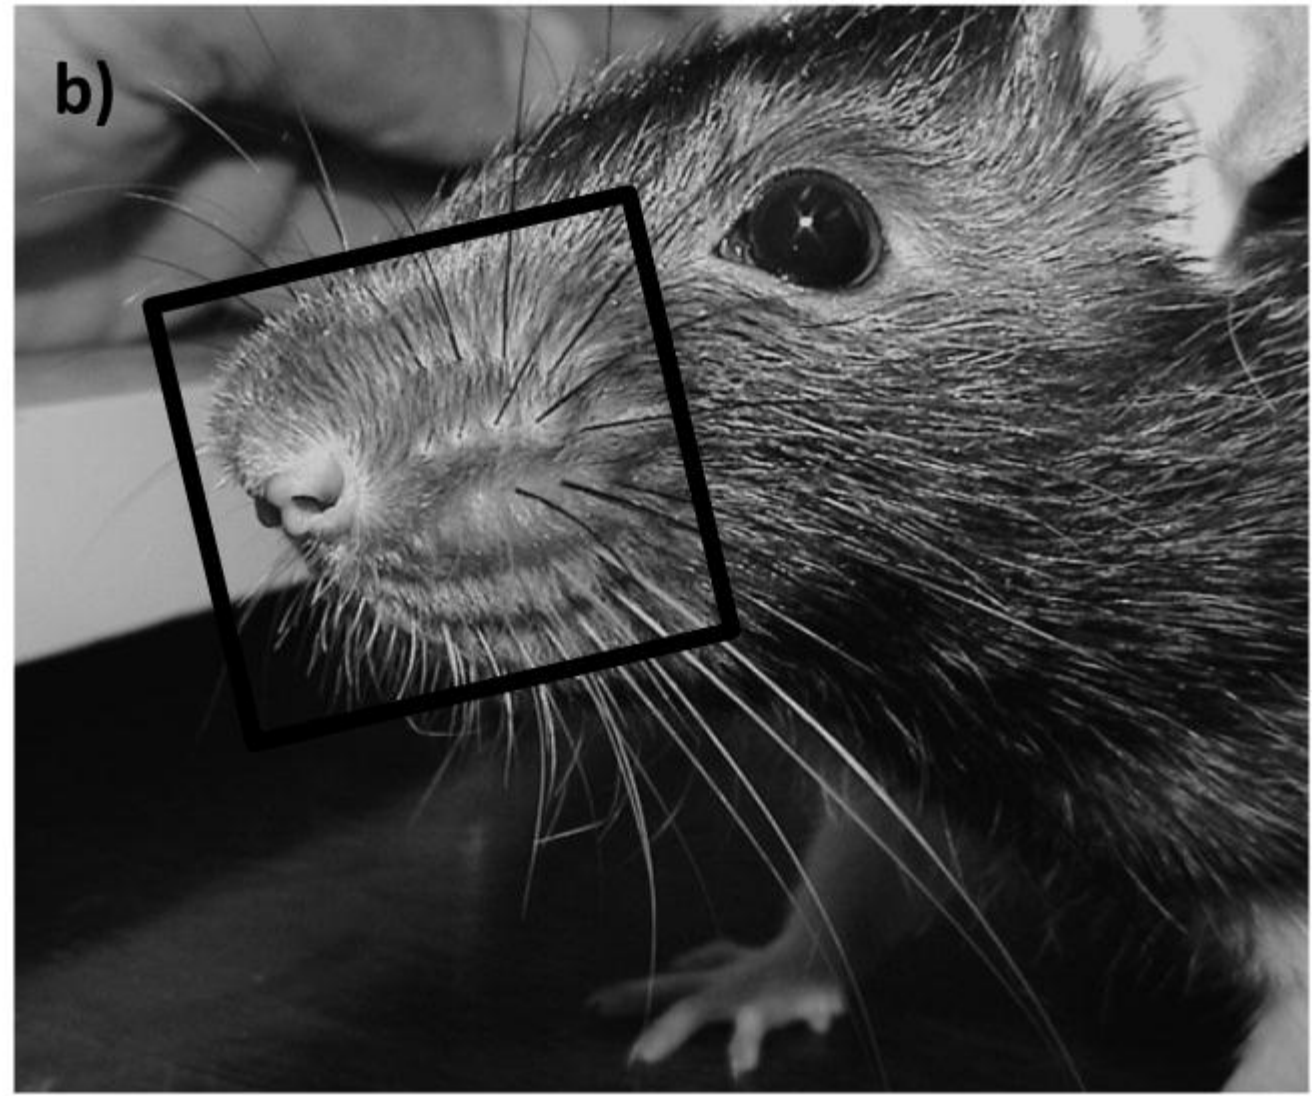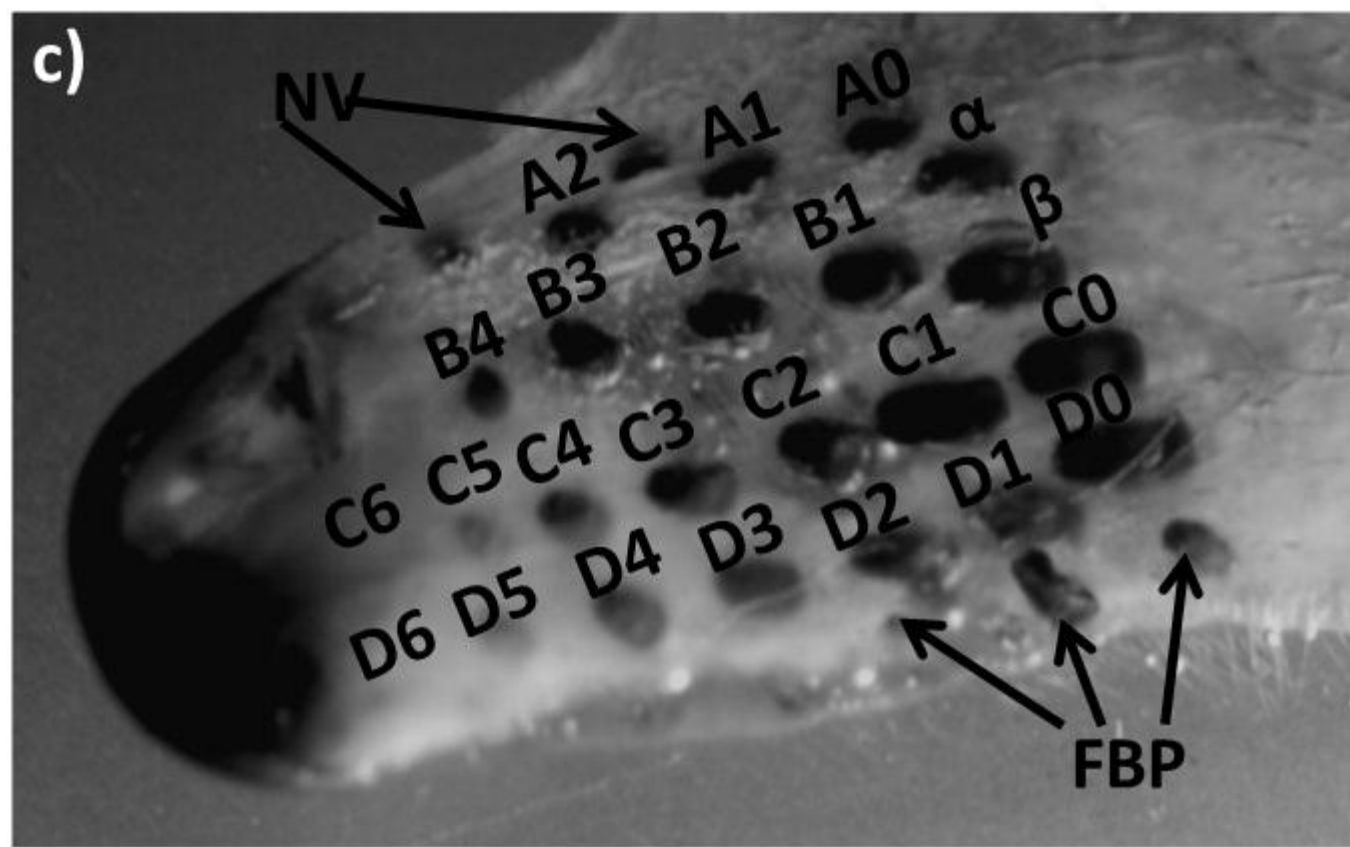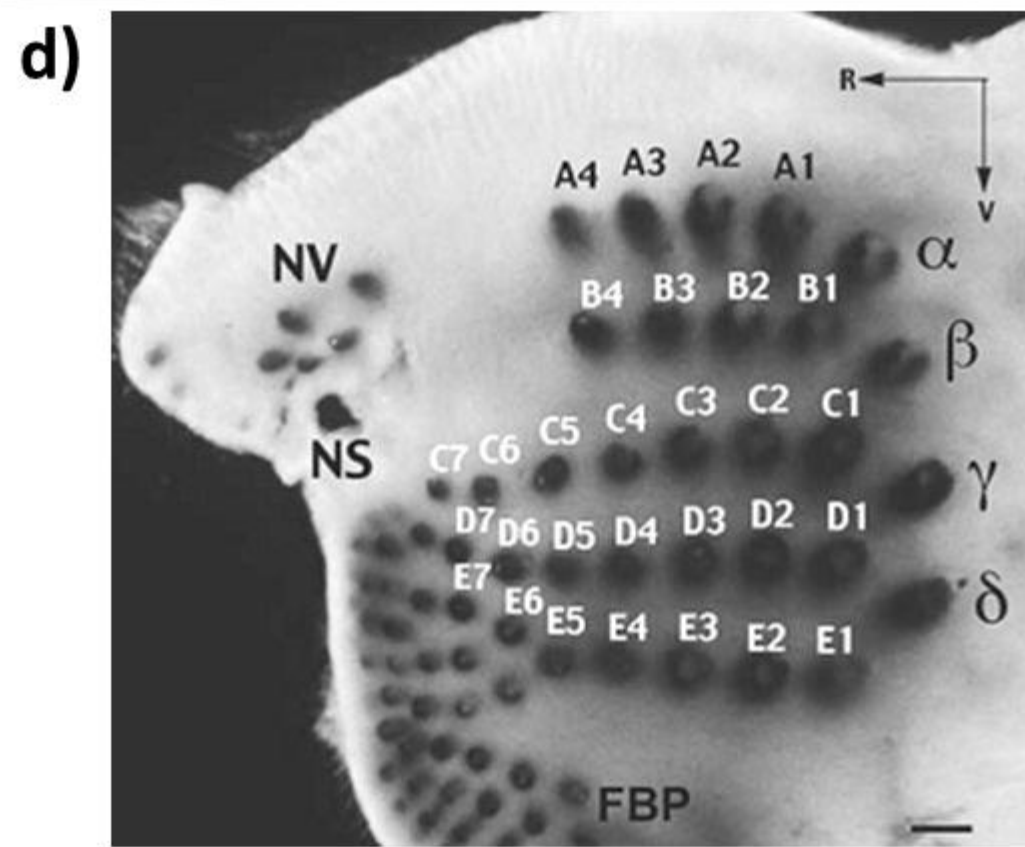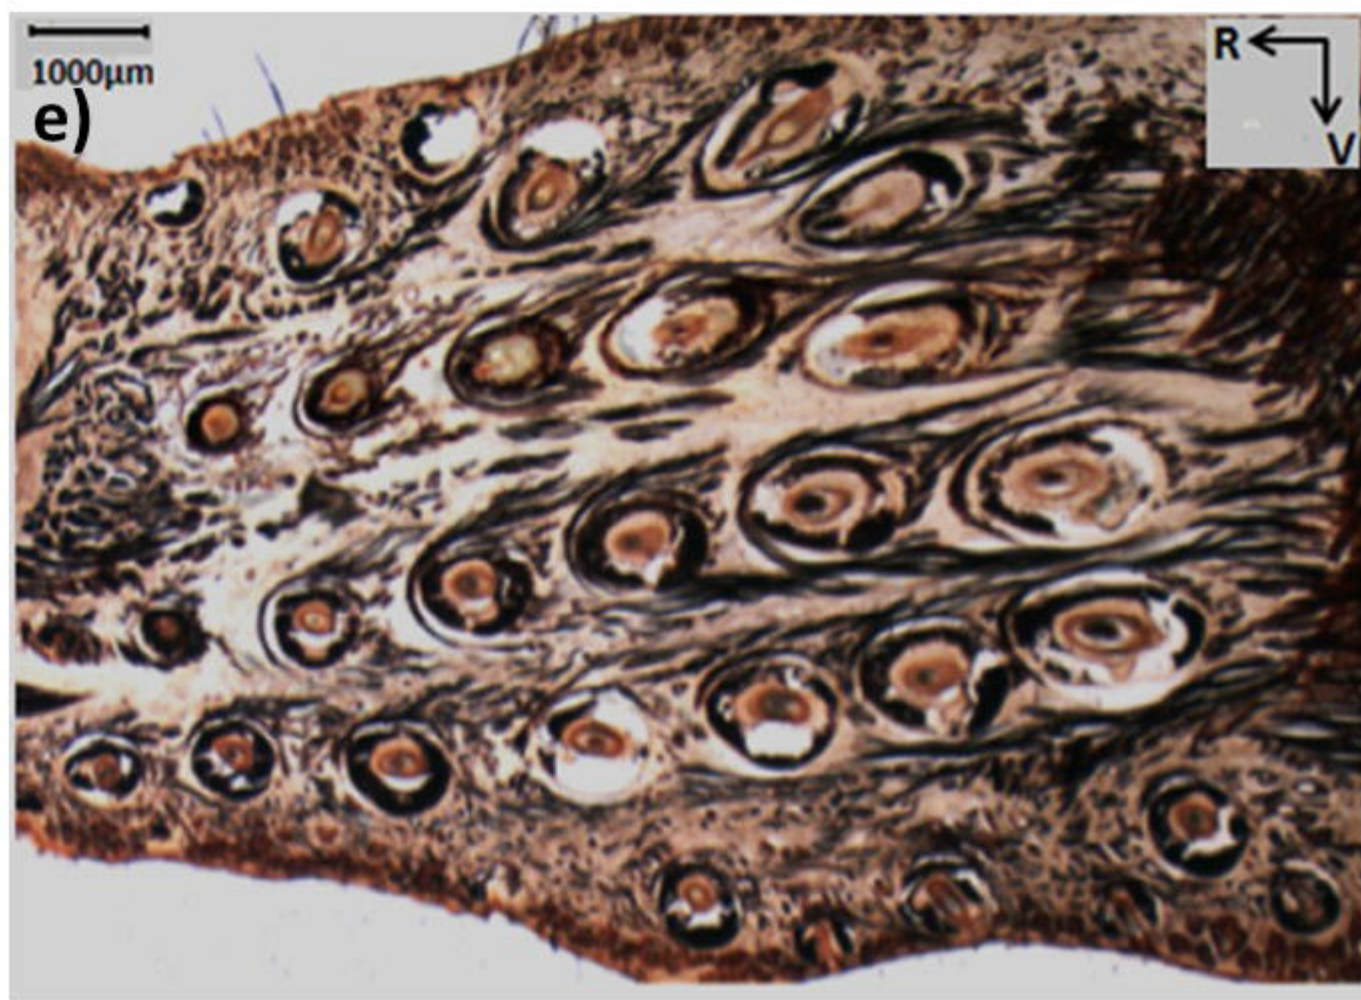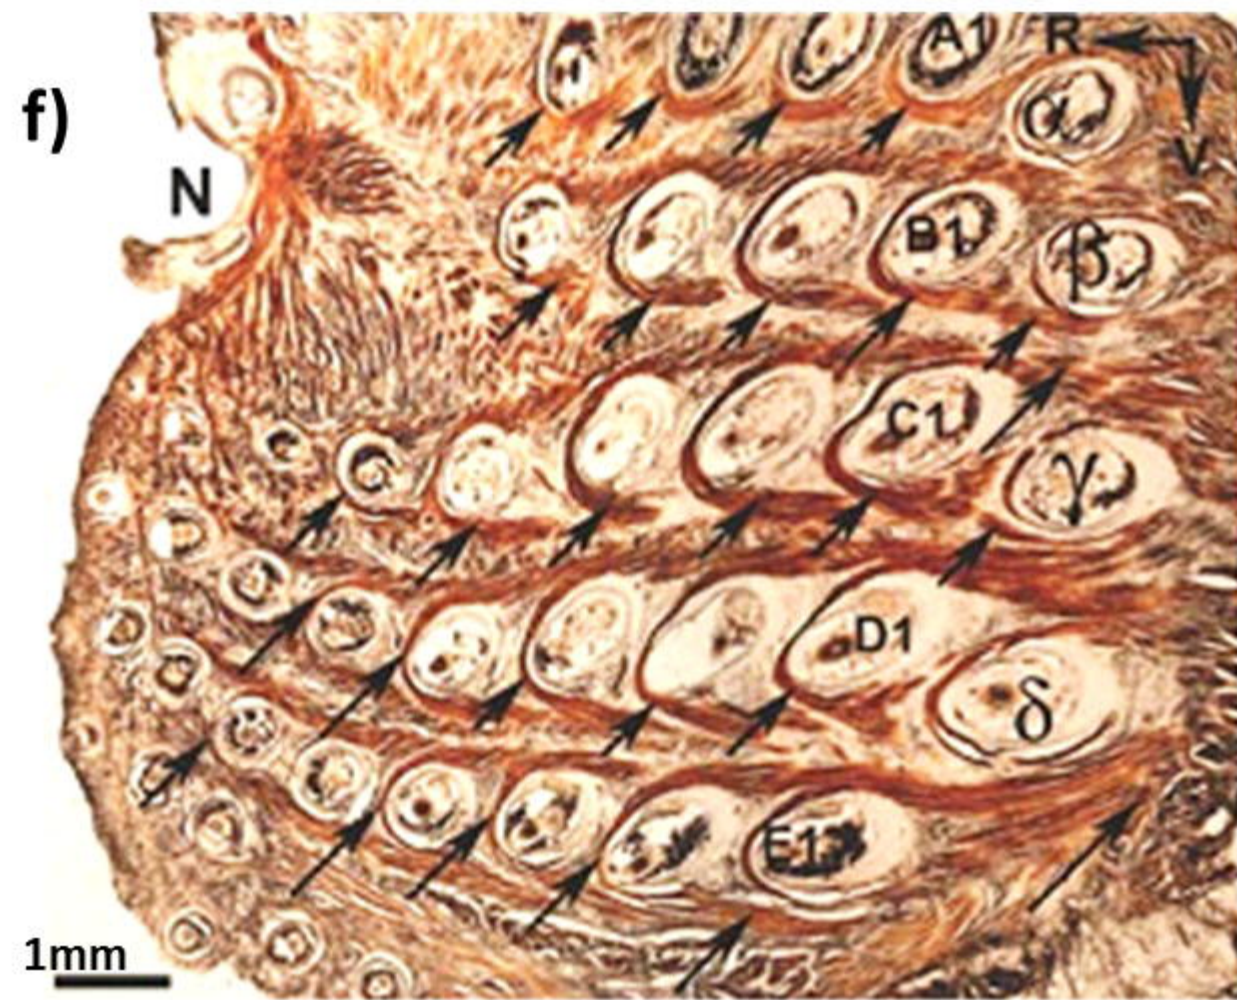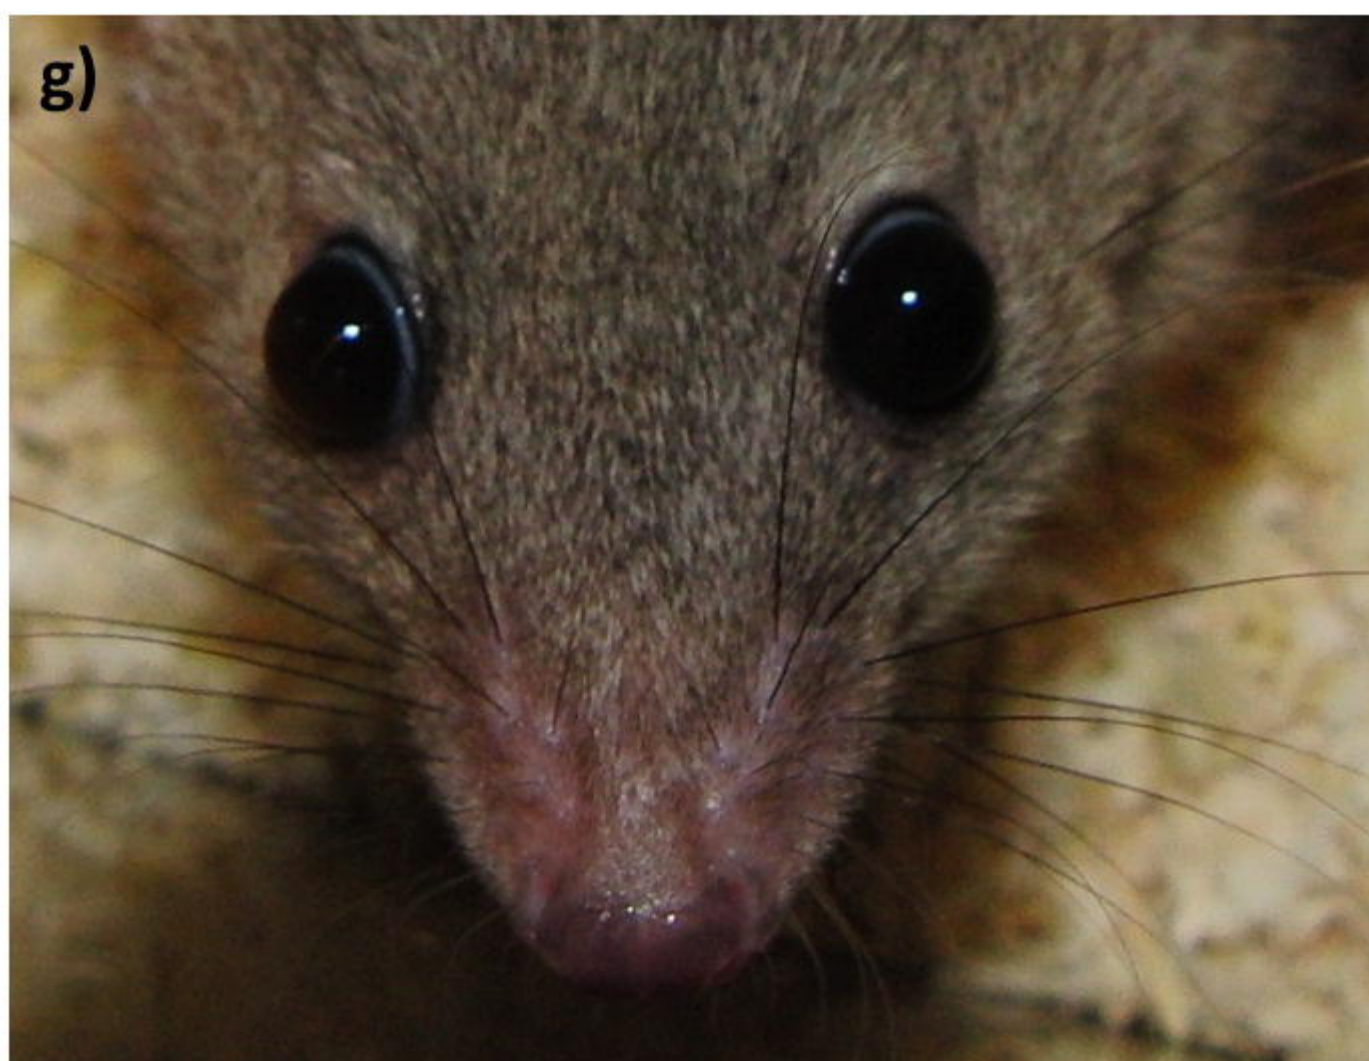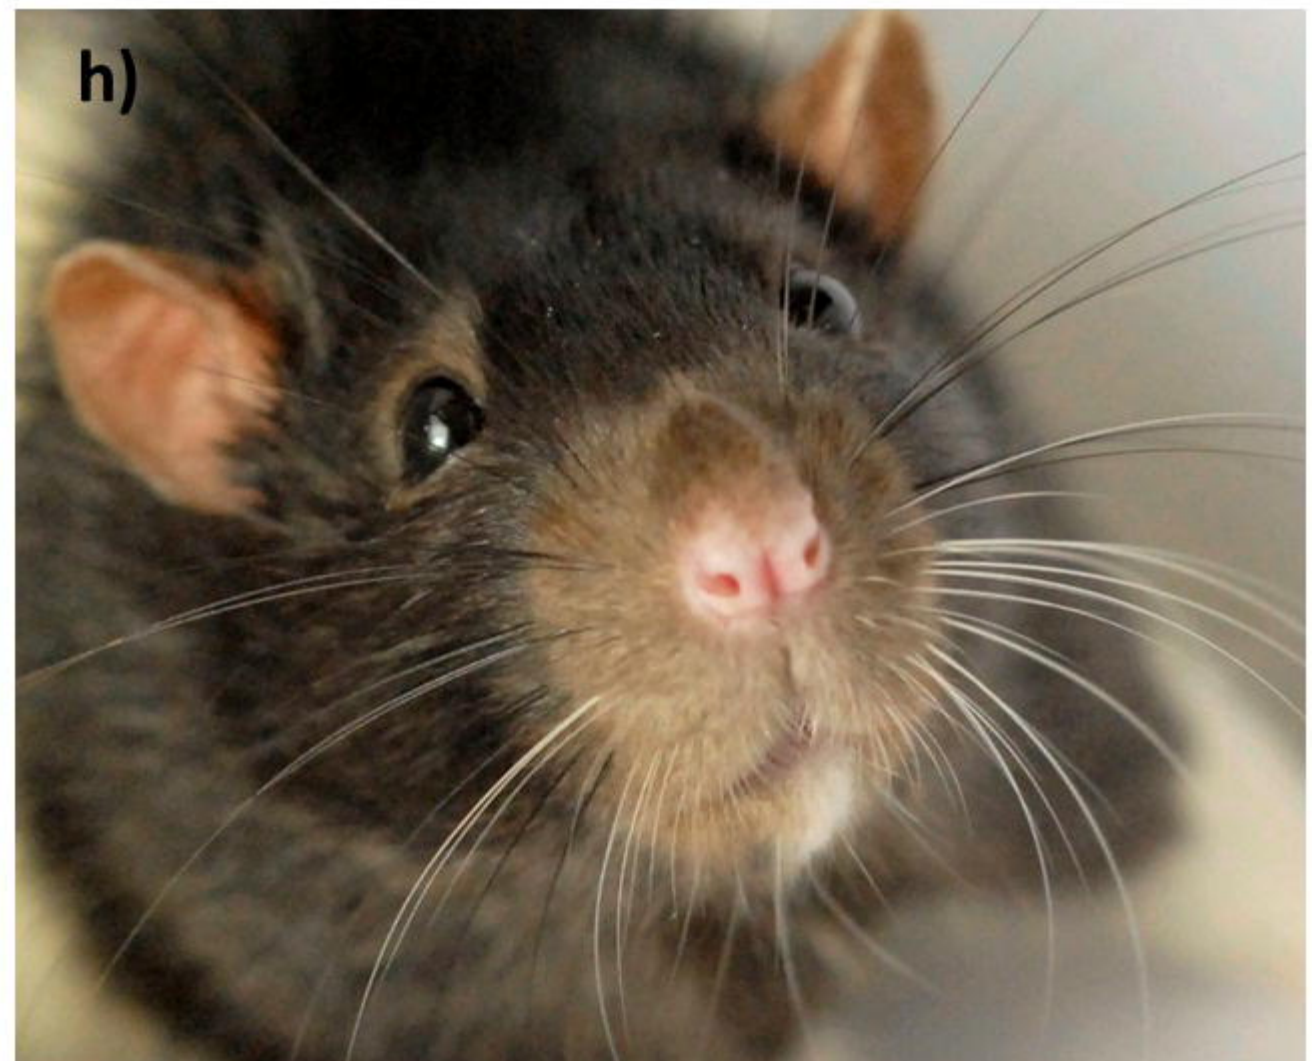

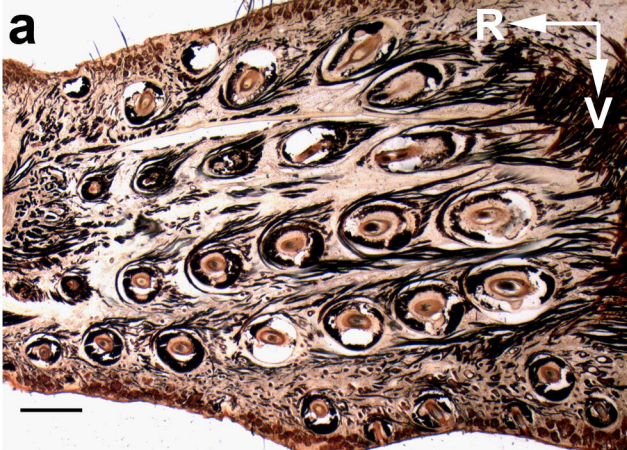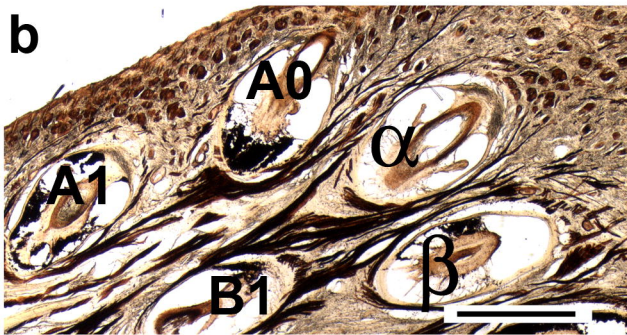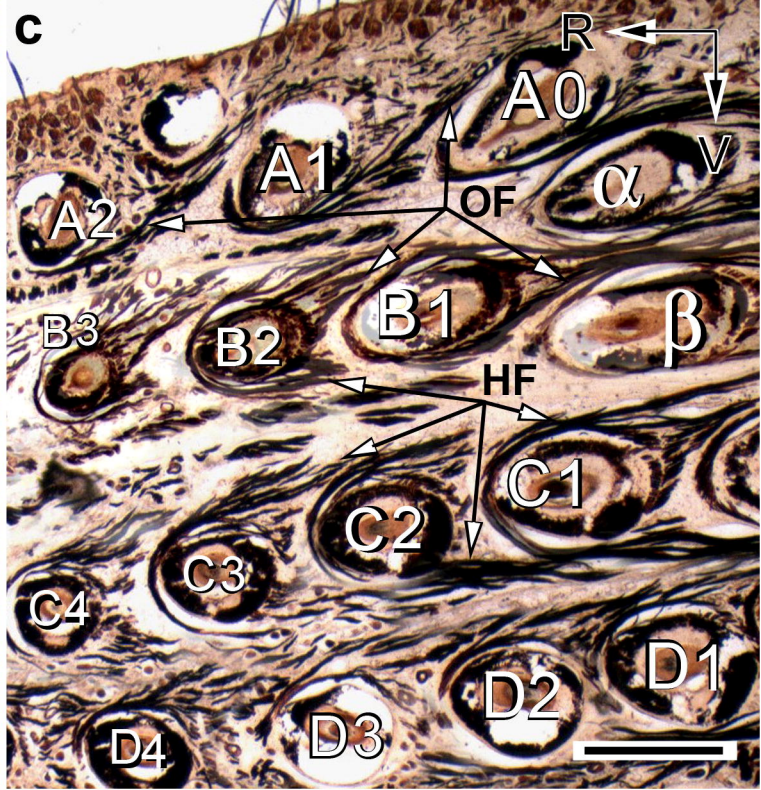

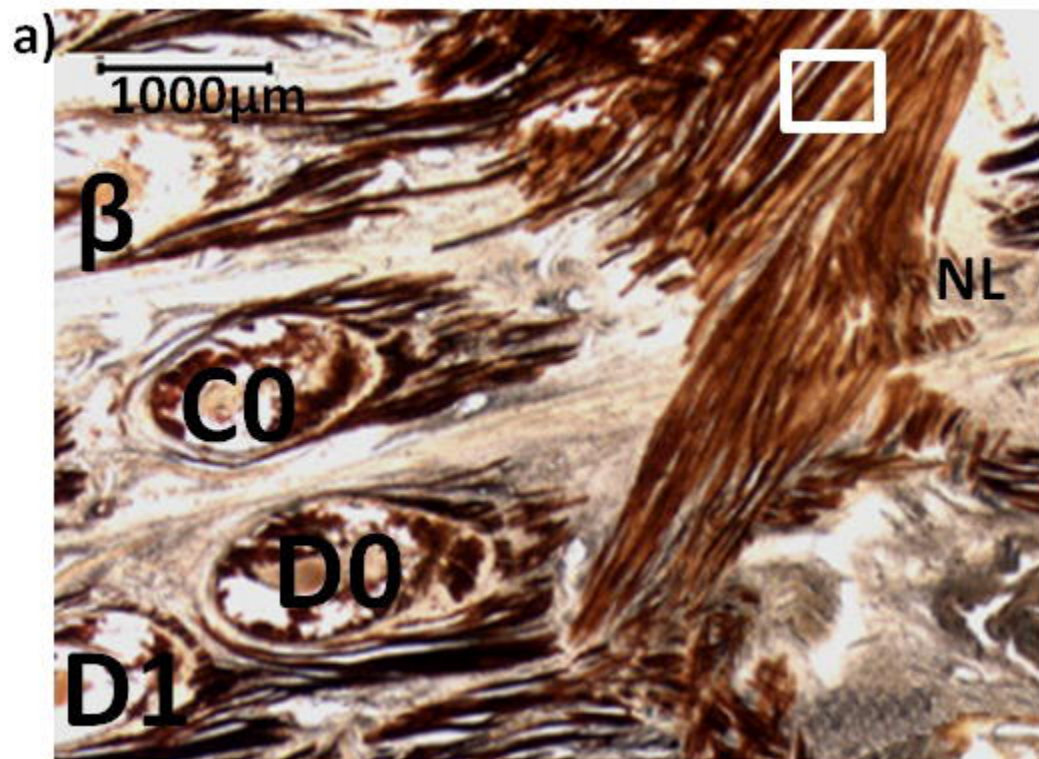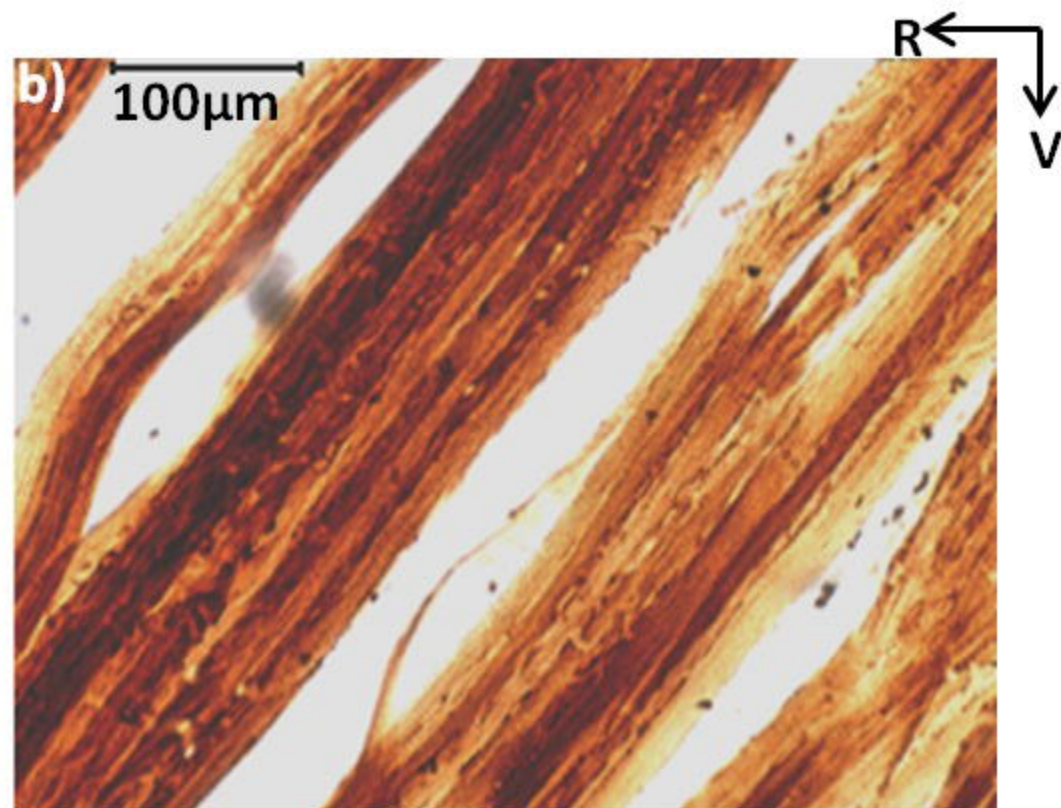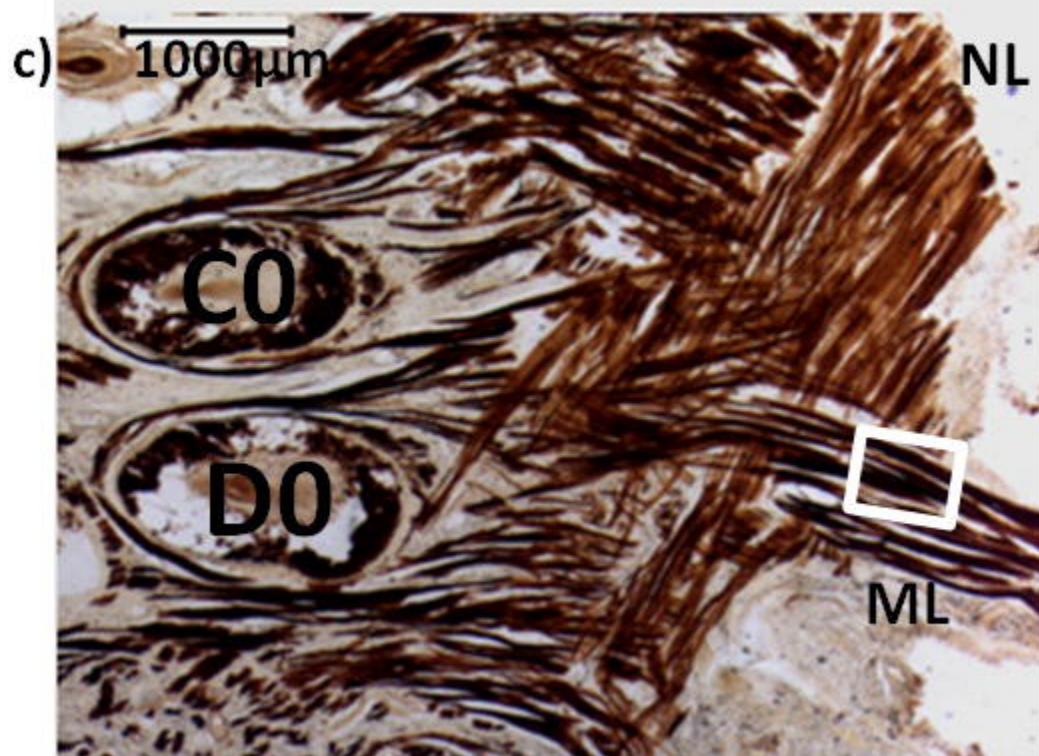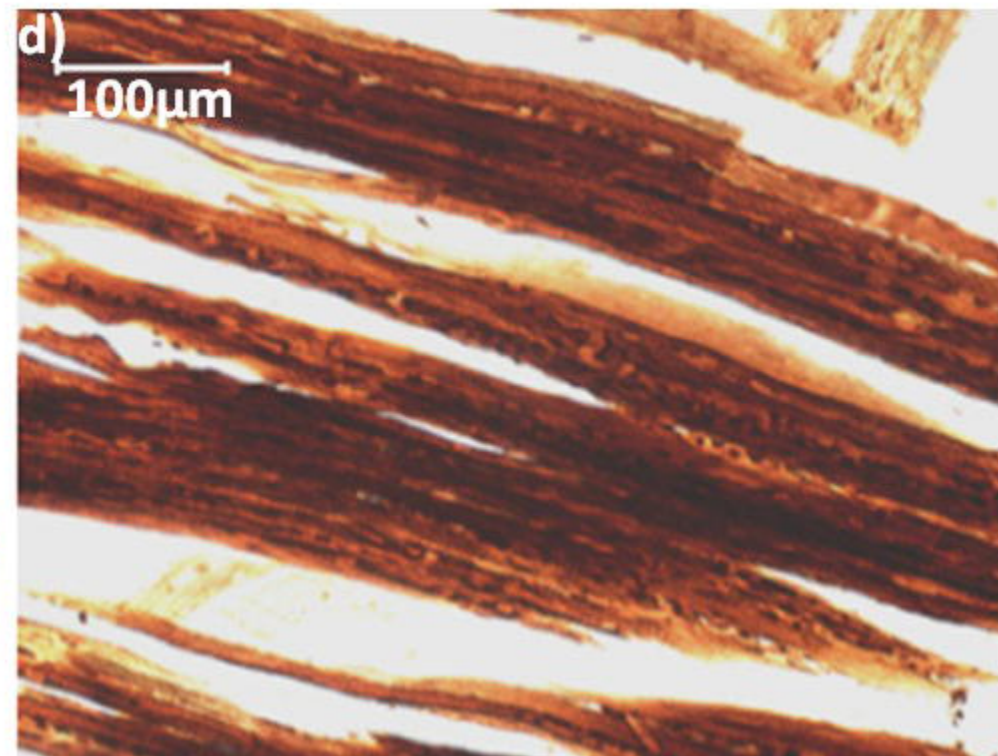

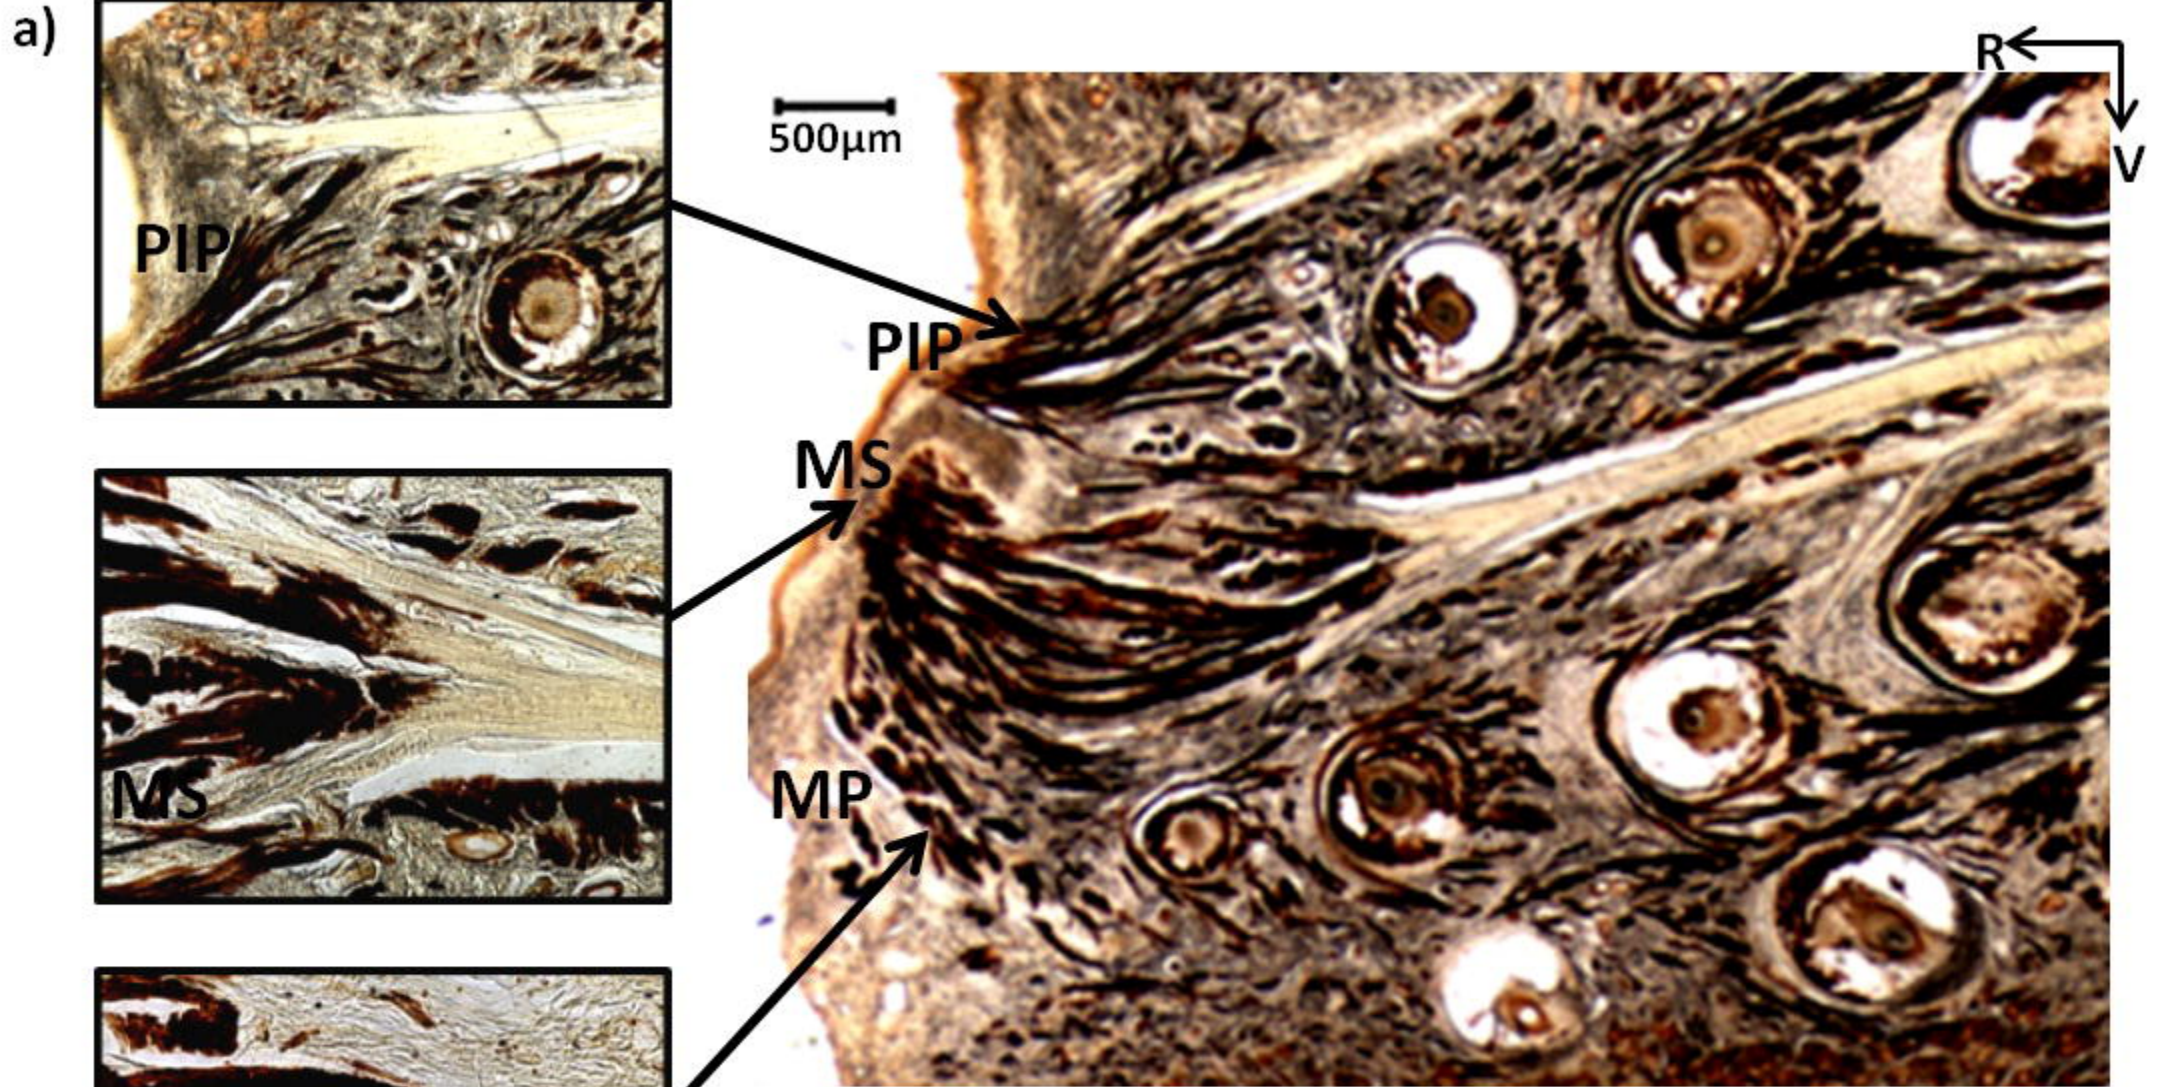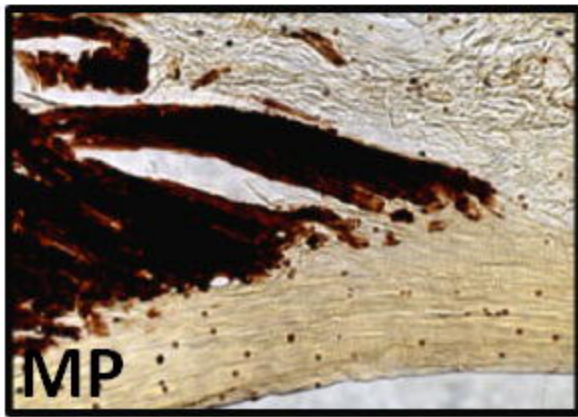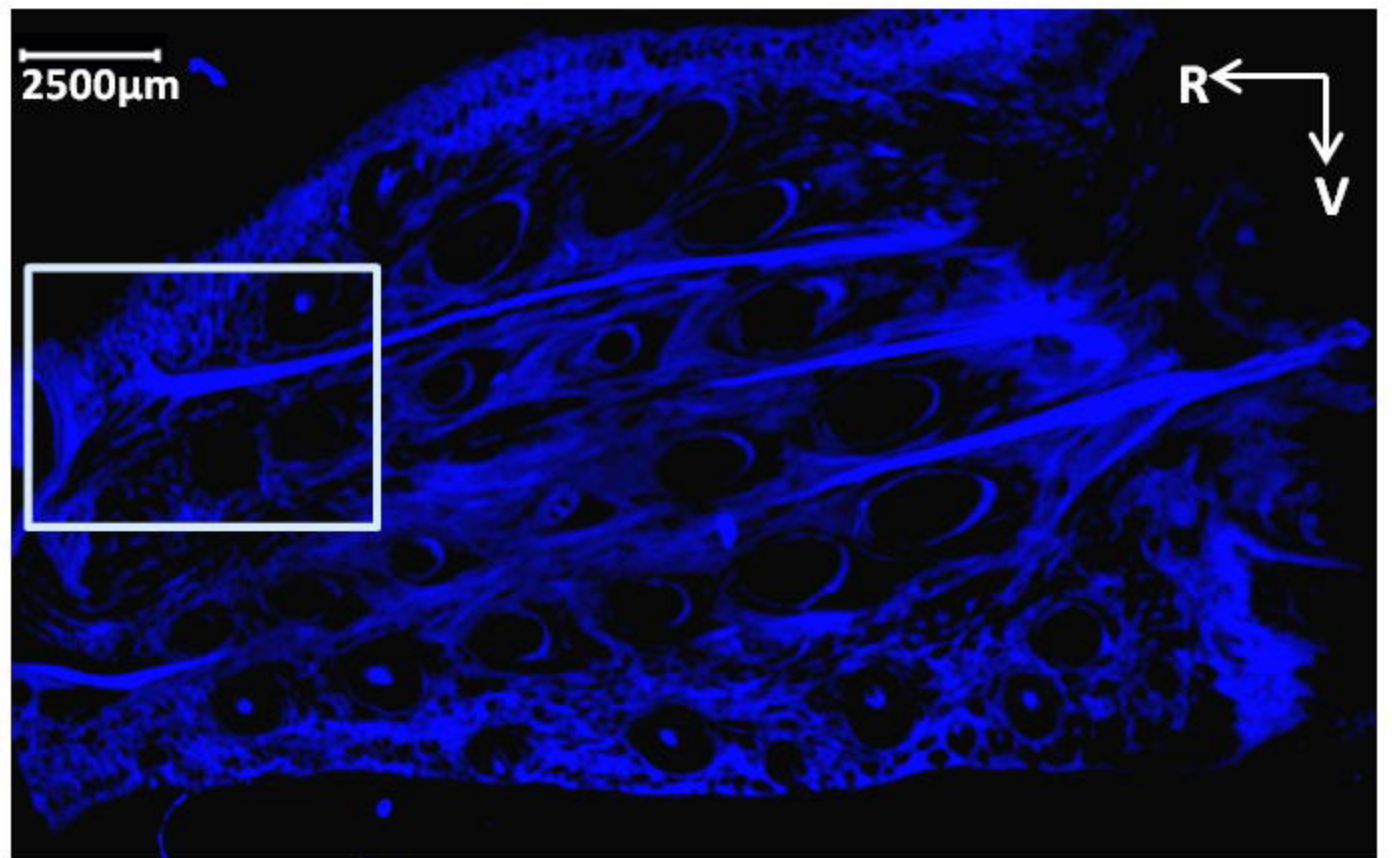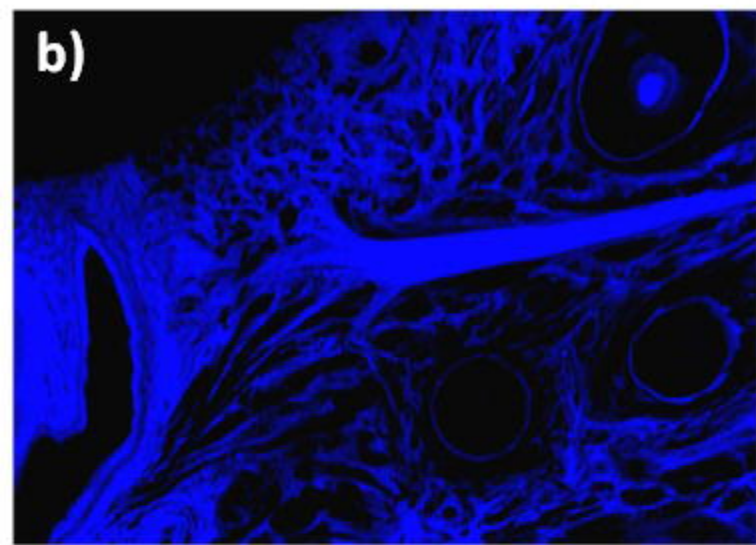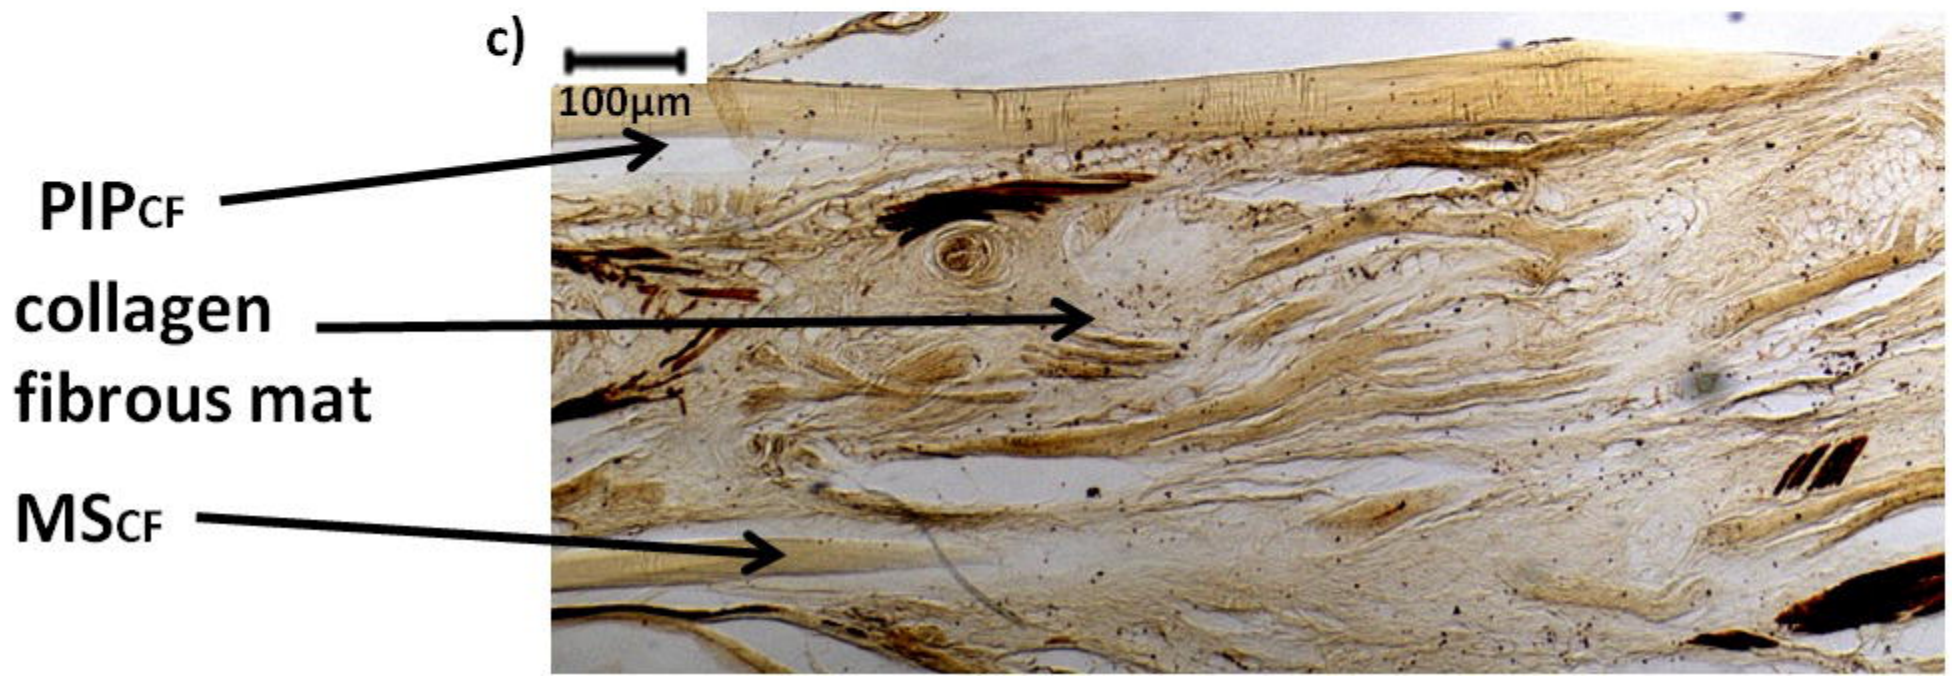



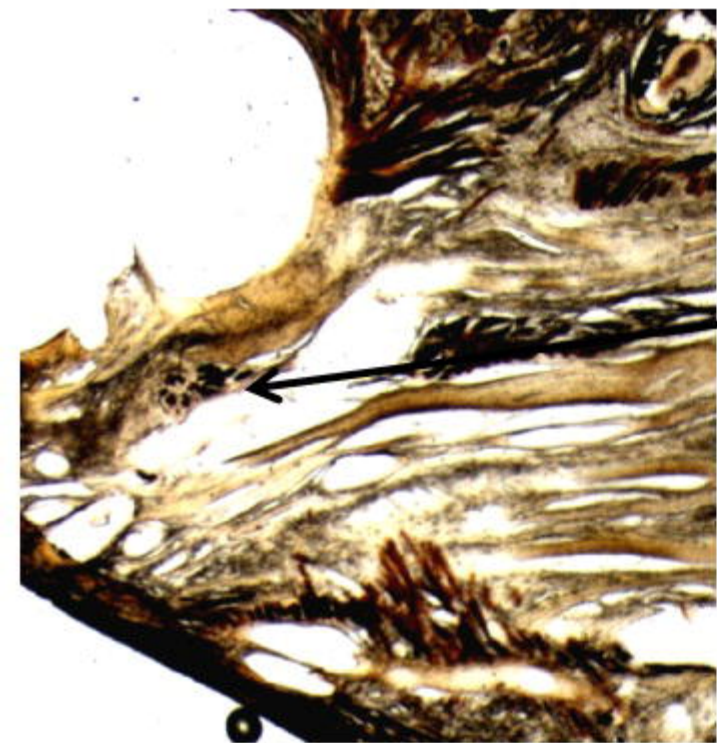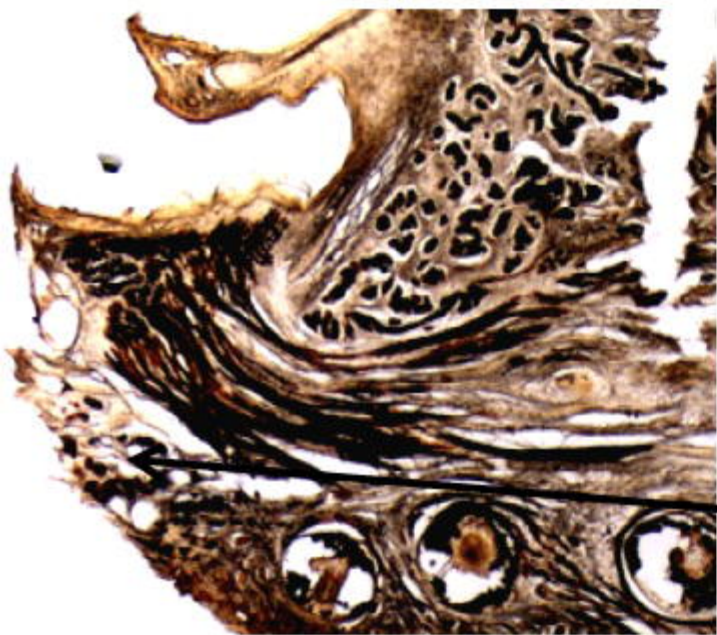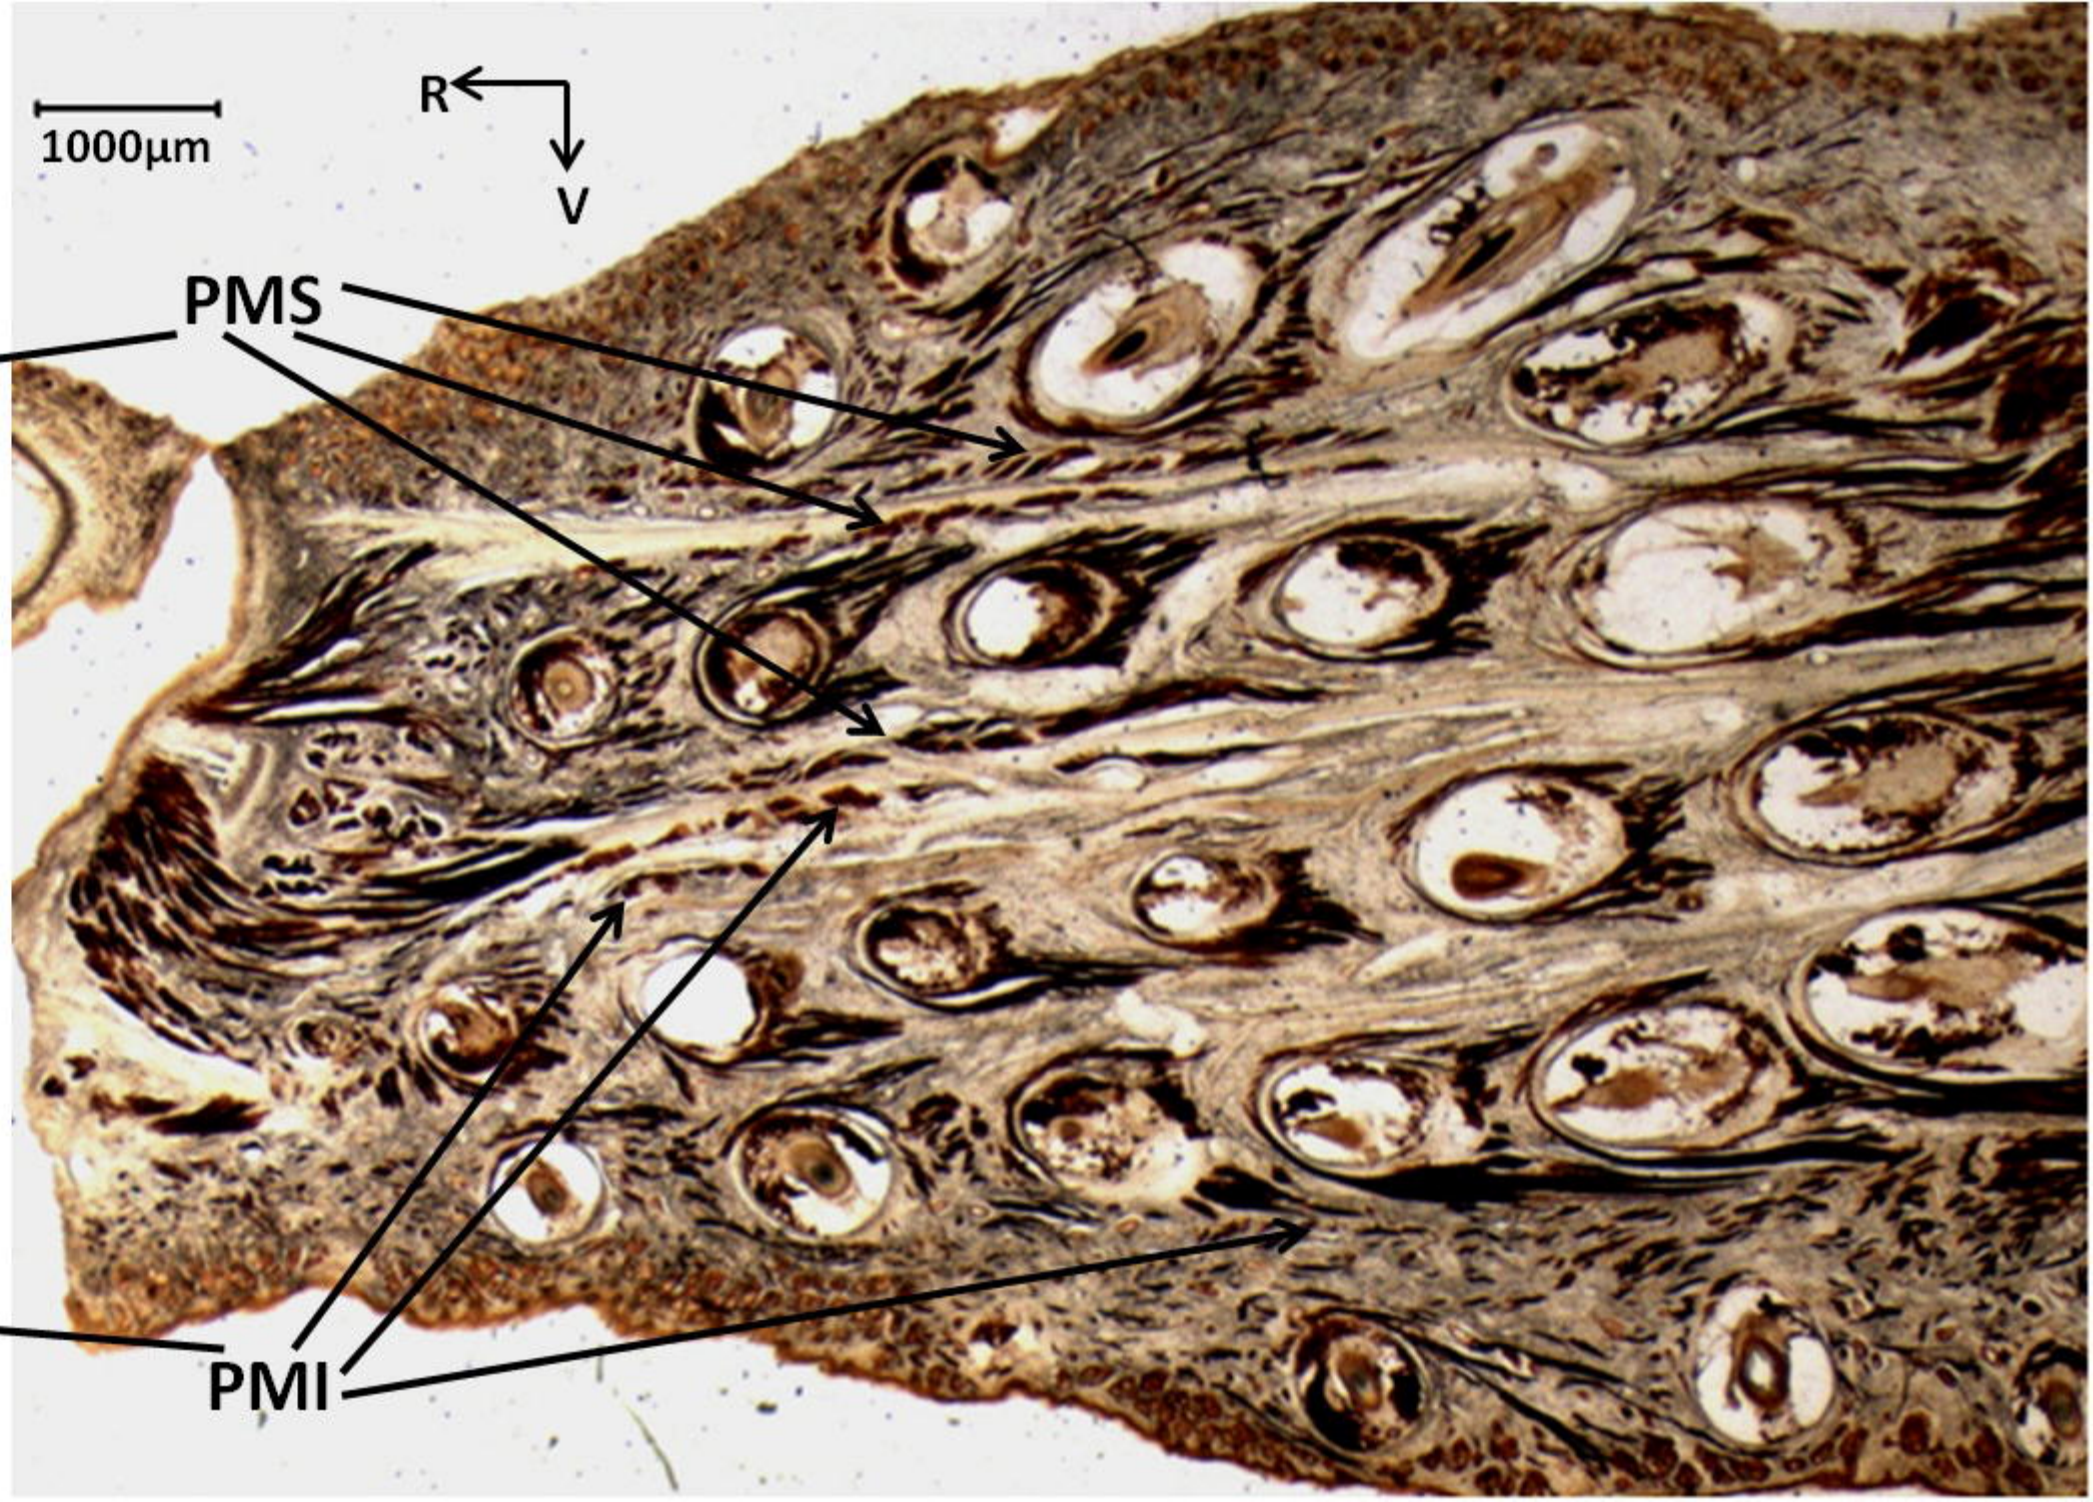

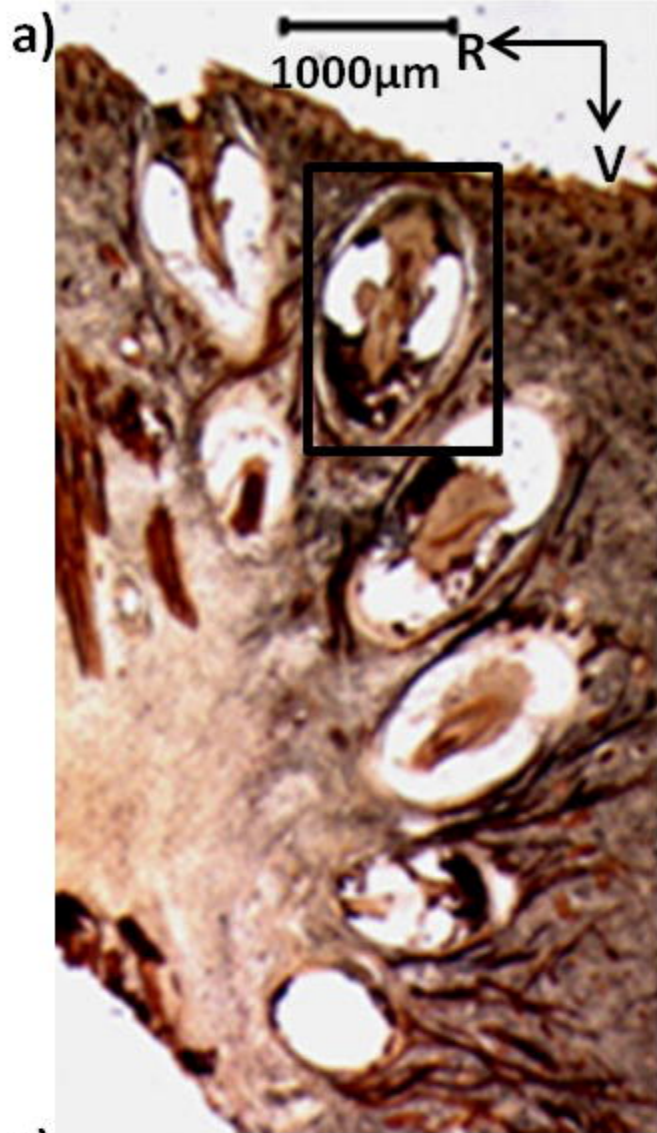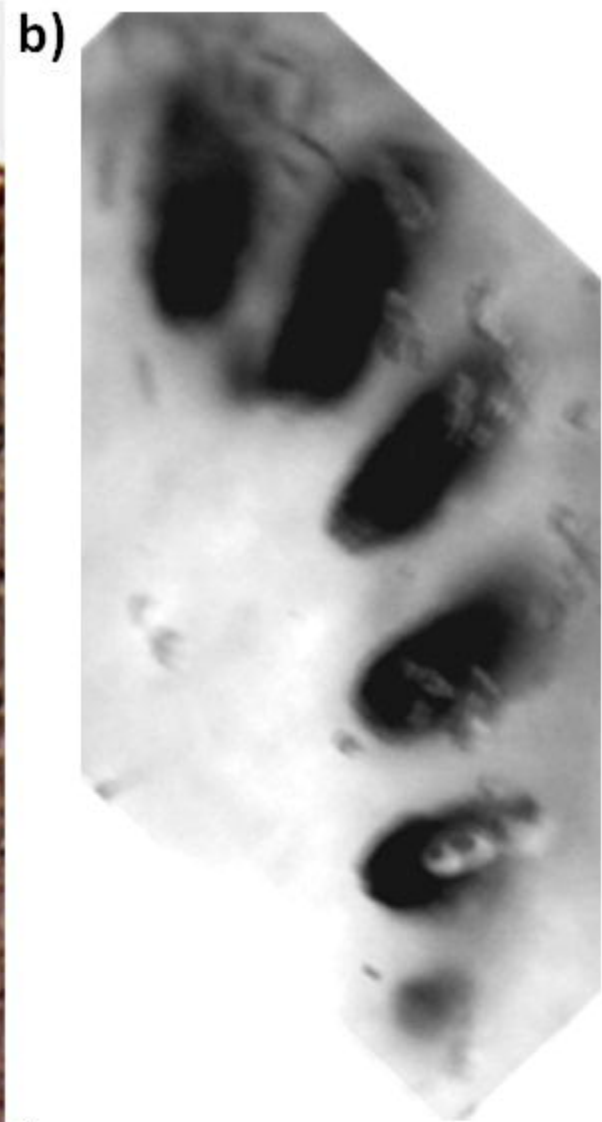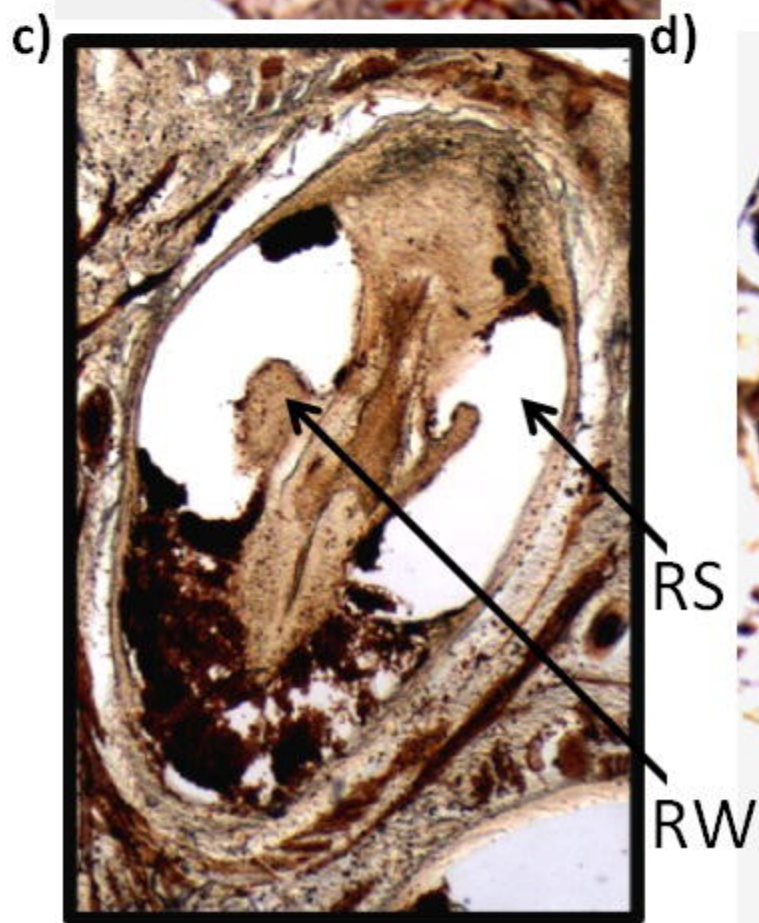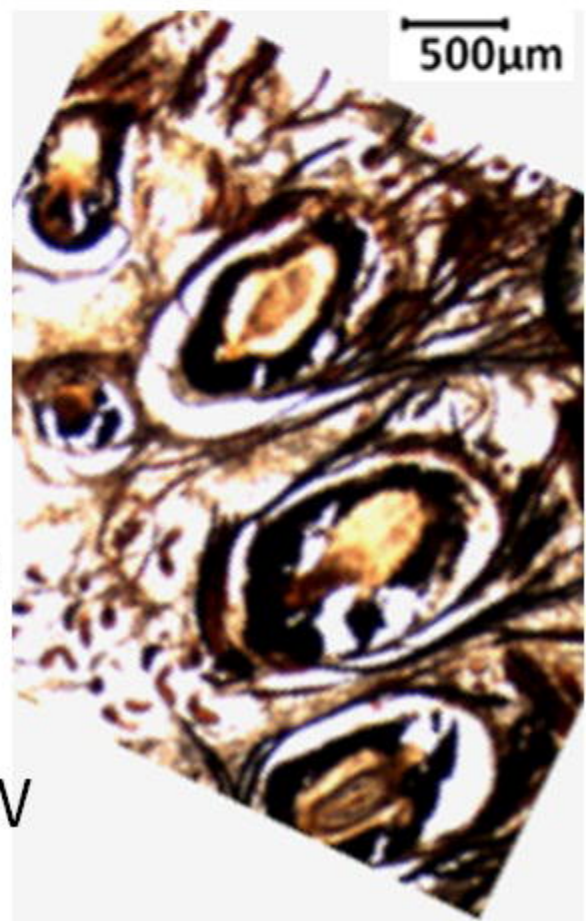

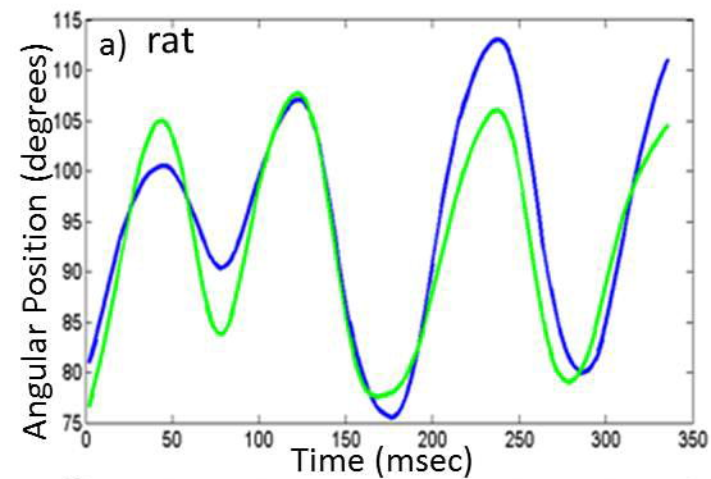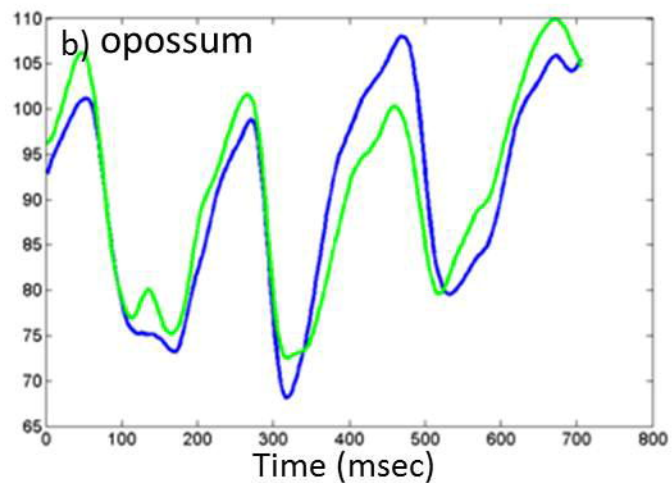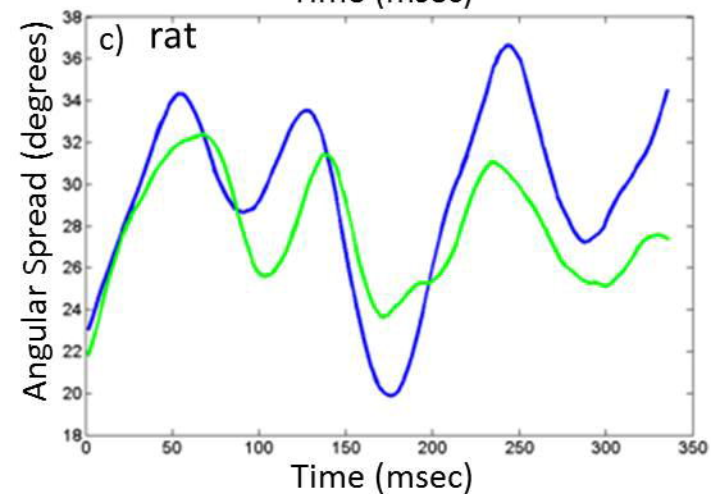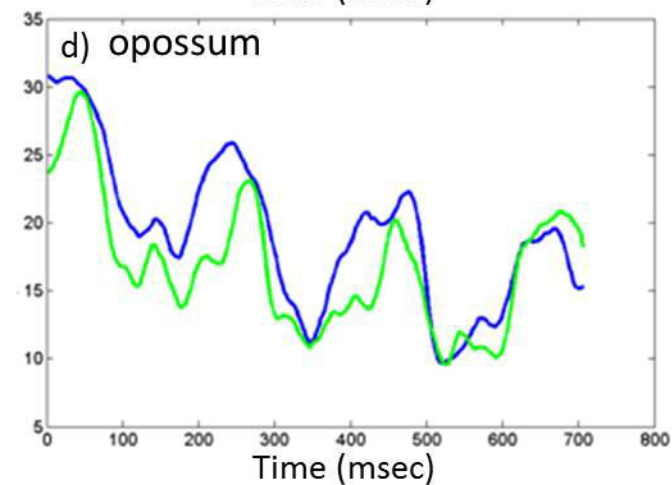

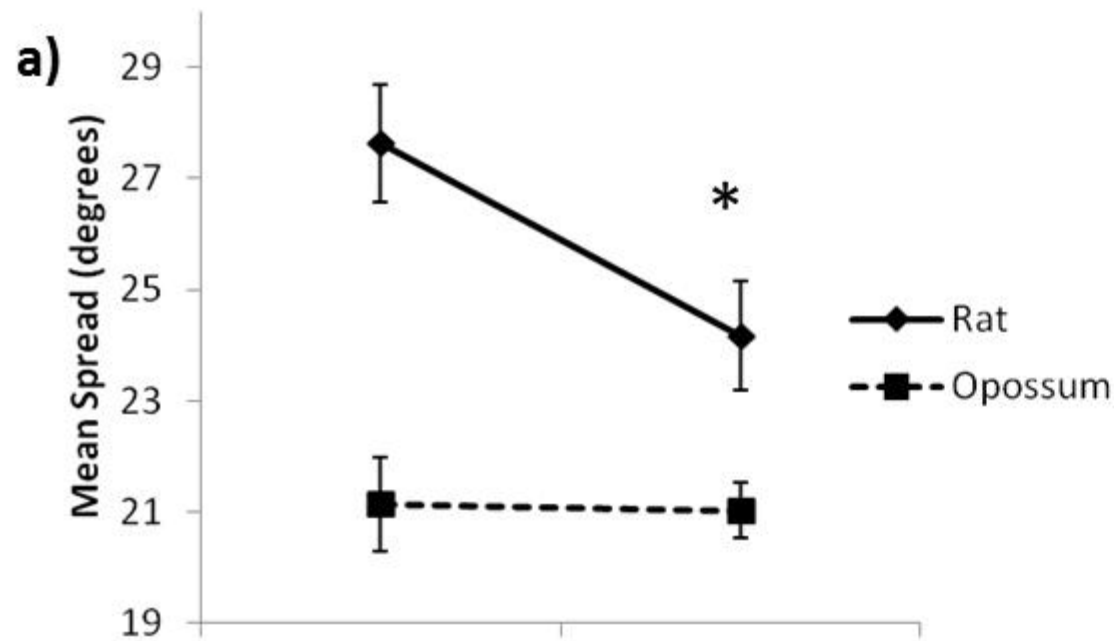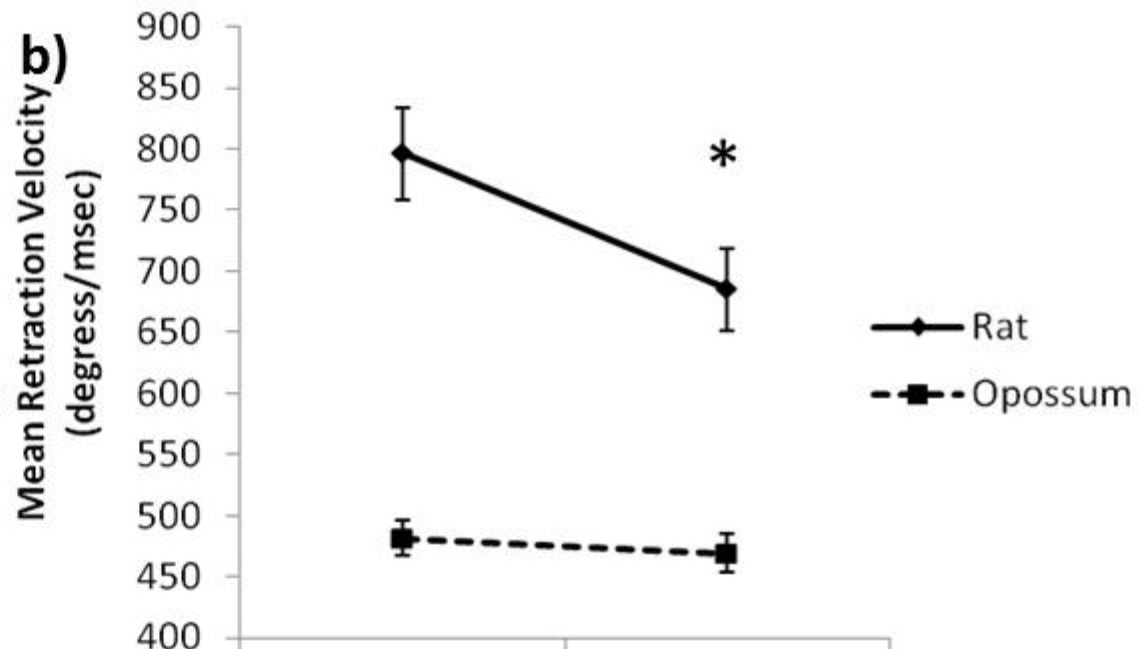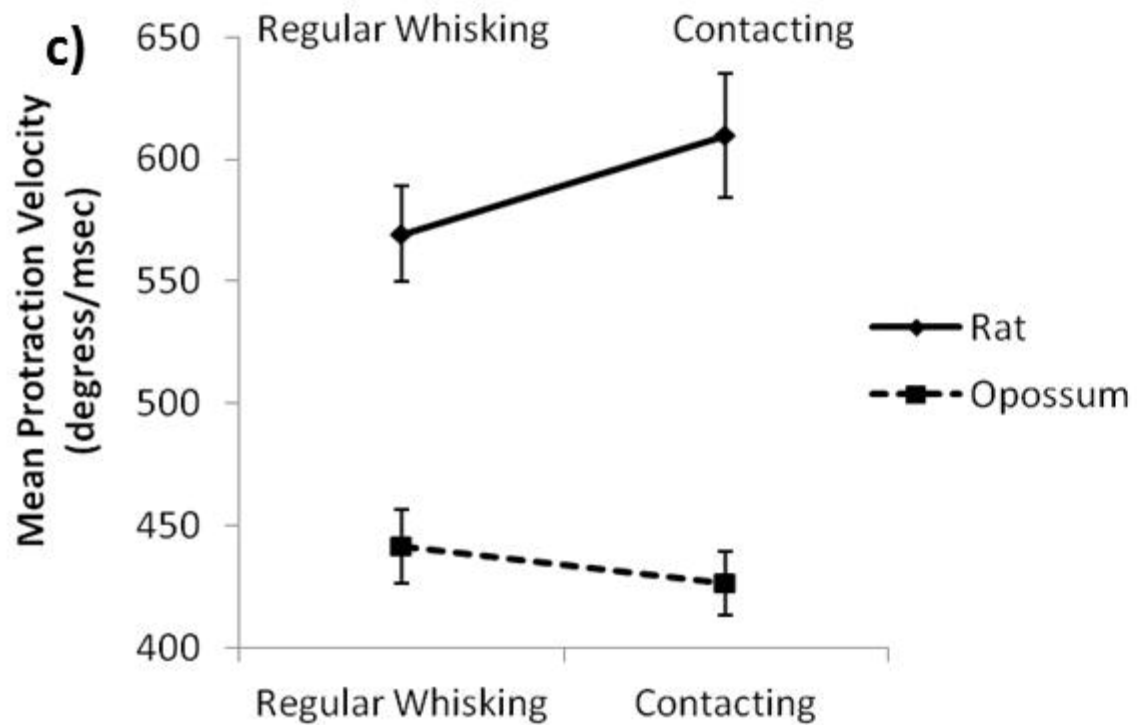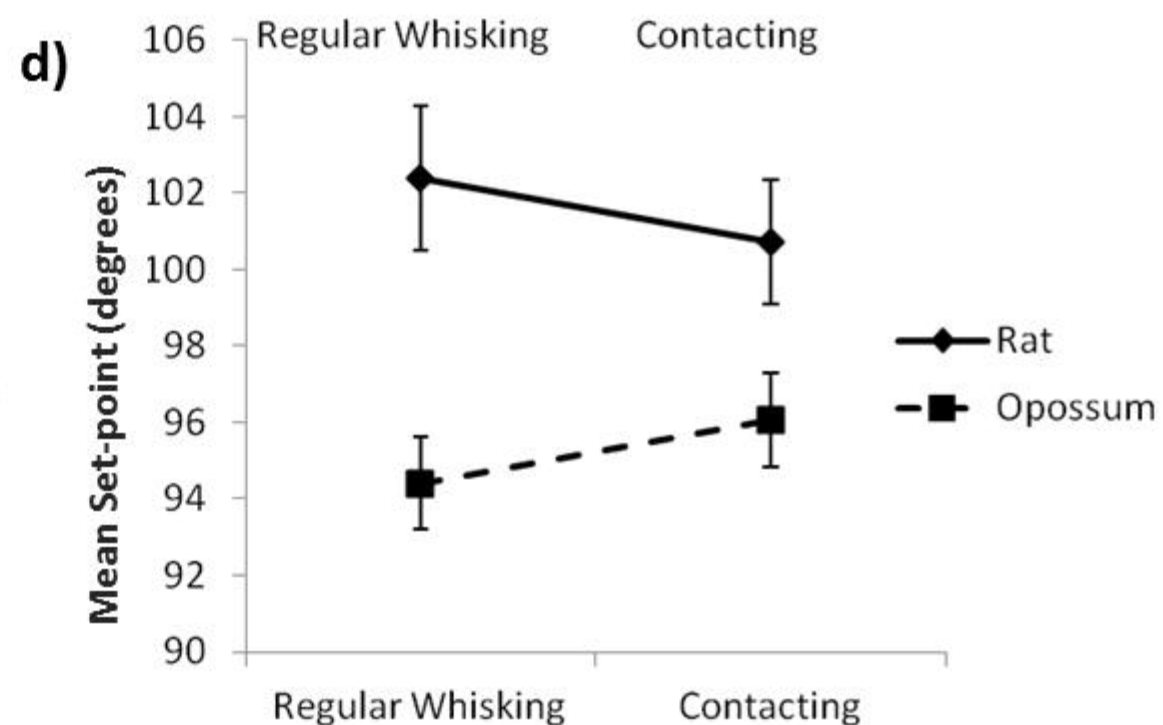

a)

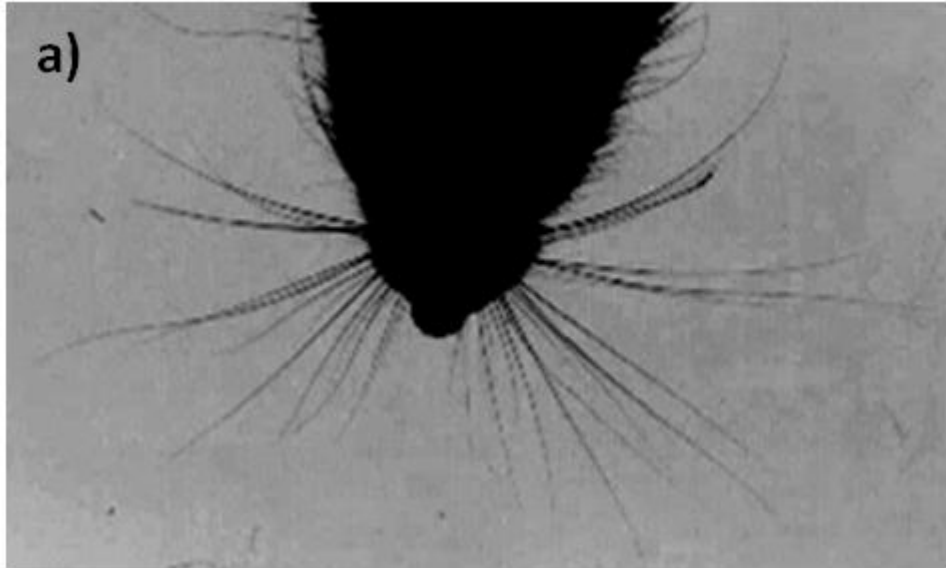

b)

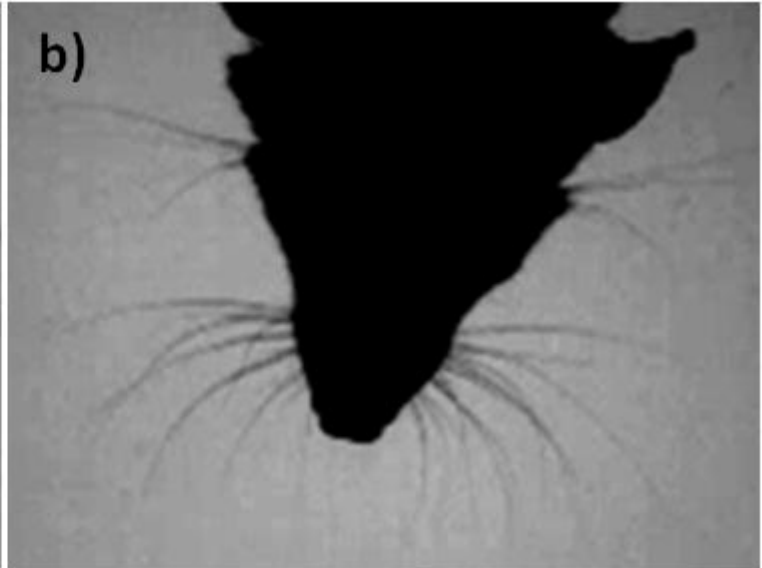

c)

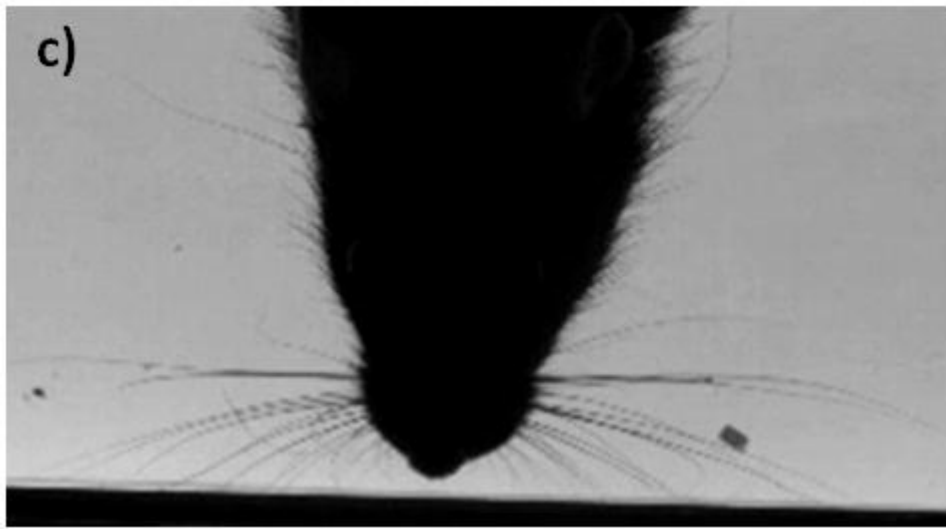

d)

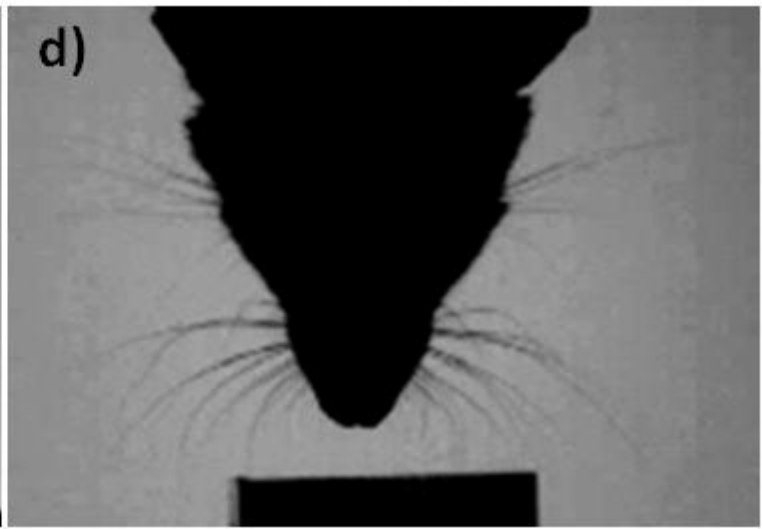

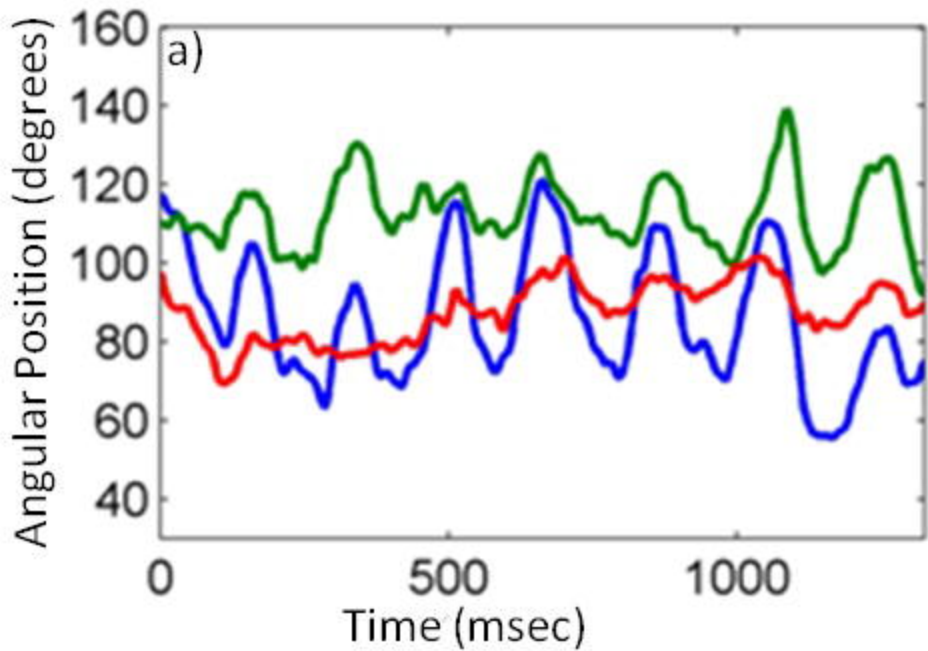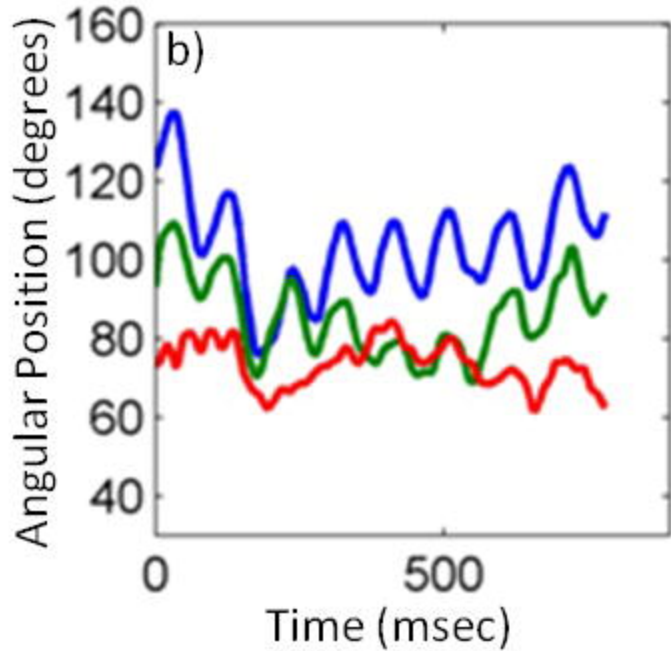

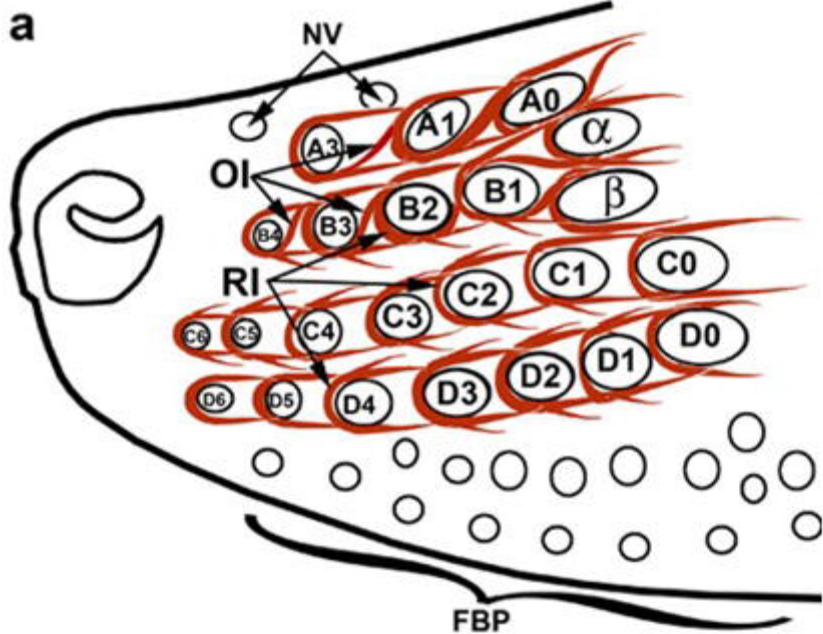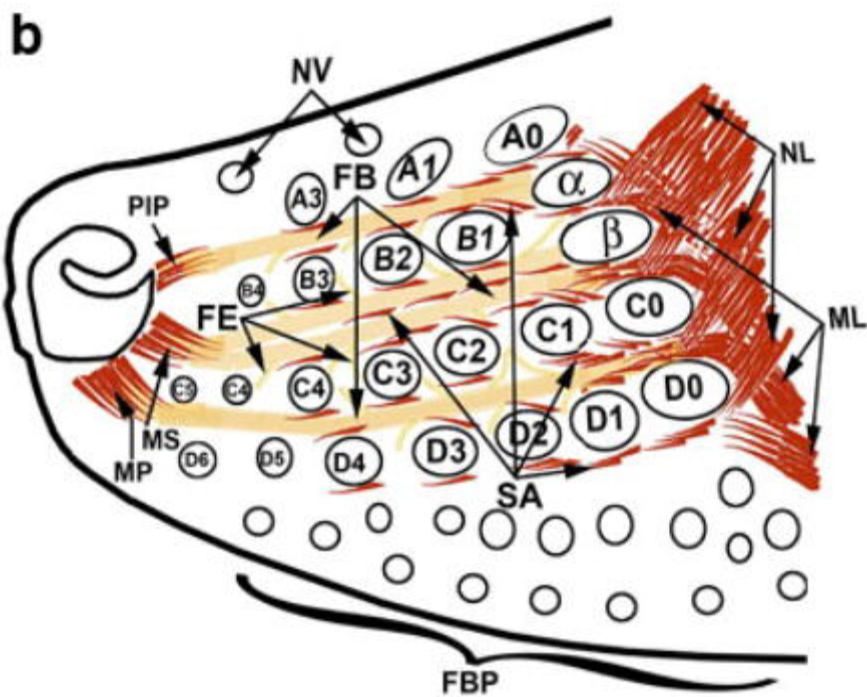

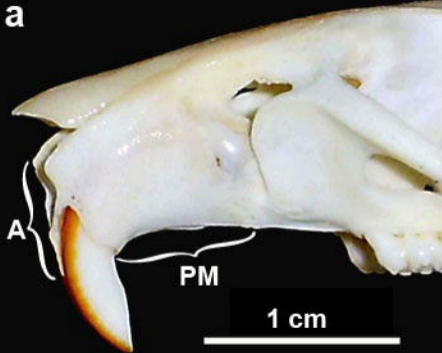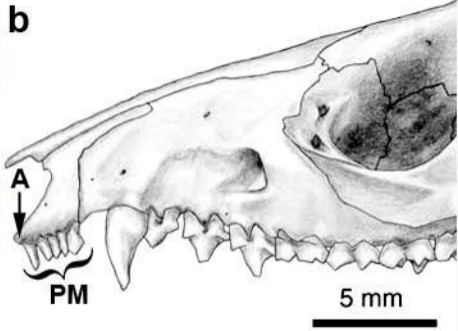

Source: https://cob.silverchair.com/jeb/article-pdf/doi/10.1242/jeb.087452/2036816/jeb_087452.pdf
